# Supplementary material for: Tpz1-Ccq1 and Tpz1-Poz1 Interactions within Fission Yeast Shelterin Modulate Ccq1 Thr93 Phosphorylation and Telomerase Recruitment
Source: PubMed Central journal article supplement (PMC4199508; doi:10.1371/journal.pgen.1004708), 2014-10-16
Supplement: pgen.1004708.s014.pdf [file pgen.1004708.s014.pdf]

| <b>Table S1</b> Telomere length correction factors (telomere/rDNA) |                               |                                |
|--------------------------------------------------------------------|-------------------------------|--------------------------------|
| Tagged protein                                                     | Genetic background            | Correction factor <sup>a</sup> |
| Tpz1-myc                                                           | wt                            | 1.00 ± 0.08                    |
|                                                                    | <i>poz1Δ</i>                  | 4.72 ± 0.29                    |
|                                                                    | <i>tpz1-W498R,I501R</i>       | 4.71 ± 0.28                    |
|                                                                    | <i>poz1Δ tpz1-W498R,I501R</i> | 4.86 ± 0.14                    |
| Ccq1-myc                                                           | wt                            | 1.00 ± 0.03                    |
|                                                                    | <i>poz1Δ</i>                  | 2.63 ± 0.09                    |
|                                                                    | <i>tpz1-W498R,I501R</i>       | 2.69 ± 0.08                    |
|                                                                    | <i>poz1Δ tpz1-W498R,I501R</i> | 2.63 ± 0.08                    |
| Poz1-myc                                                           | wt                            | 1.00 ± 0.05                    |
|                                                                    | <i>rap1Δ</i>                  | 3.69 ± 0.14                    |
|                                                                    | <i>tpz1-W498R,I501R</i>       | 3.78 ± 0.16                    |
|                                                                    | <i>rap1Δ tpz1-W498R,I501R</i> | 4.01 ± 0.15                    |
| Trt1-myc                                                           | wt                            | 1.00 ± 0.02                    |
|                                                                    | <i>poz1Δ</i>                  | 3.72 ± 0.14                    |
|                                                                    | <i>tpz1-W498R,I501R</i>       | 4.90 ± 0.14                    |

<sup>a</sup>Mean ± standard error of the mean. Values are normalized to wild-type cells with indicated tagged proteins.
