# Supplementary material for: Tpz1-Ccq1 and Tpz1-Poz1 Interactions within Fission Yeast Shelterin Modulate Ccq1 Thr93 Phosphorylation and Telomerase Recruitment
Source: PubMed Central journal article supplement (PMC4199508; doi:10.1371/journal.pgen.1004708), 2014-10-16
Supplement: pgen.1004708.s015.pdf [file pgen.1004708.s015.pdf]

**Table S2** Fission yeast strains used in this study.

| Figure | Strain      | Full Genotype <sup>a</sup>                         |                                                                                                                                       |
|--------|-------------|----------------------------------------------------|---------------------------------------------------------------------------------------------------------------------------------------|
| 3B     | 1 TN7204    | <i>poz1-FLAG</i>                                   | <i>h<sup>-</sup> his3-D1 poz1<sup>+</sup>::5FLAG-TEV-Avitag-kanMX6</i>                                                                |
|        | 2 TN7553    | <i>poz1-FLAG tpz1-myc</i>                          | <i>h<sup>-</sup> his3-D1 poz1<sup>+</sup>::5FLAG-TEV-Avitag-kanMX6 tpz1<sup>+</sup>::13myc-kanMX6</i>                                 |
|        | 3 JH11179   | <i>poz1-FLAG tpz1-L449R-myc</i>                    | <i>h<sup>+</sup> ade6-M216 his3-D1 poz1<sup>+</sup>::5FLAG-TEV-Avitag-kanMX6 tpz1-L449R::13myc-kanMX6</i>                             |
|        | 4 JH11241   | <i>poz1-FLAG tpz1-Y439R,L445R-myc</i>              | <i>h<sup>-</sup> his3-D1 poz1<sup>+</sup>::5FLAG-TEV-Avitag-kanMX6 tpz1-Y439R,L445R::13myc-kanMX6</i>                                 |
|        | 5 JH11271   | <i>poz1-FLAG tpz1-Y439R,L445R,L449R-myc</i>        | <i>h<sup>+</sup> his3-D1 poz1<sup>+</sup>::5FLAG-TEV-Avitag-kanMX6 tpz1-Y439R,L445R,L449R-13myc-kanMX6</i>                            |
| 3C     | 1 TN6770    | <i>ccq1-FLAG</i>                                   | <i>h<sup>+</sup> his3-D1 ccq1<sup>+</sup>::5FLAG-kanMX6</i>                                                                           |
|        | 2 TN7505    | <i>ccq1-FLAG tpz1-myc</i>                          | <i>h<sup>+</sup> his3-D1 ccq1<sup>+</sup>::5FLAG-kanMX6 tpz1<sup>+</sup>::13myc-kanMX6</i>                                            |
|        | 3 JH11174   | <i>ccq1-FLAG tpz1-L449R-myc</i>                    | <i>h<sup>-</sup> ccq1<sup>+</sup>::5FLAG-kanMX6 tpz1-L449R::13myc-kanMX6</i>                                                          |
|        | 4 JH11238   | <i>ccq1-FLAG tpz1-Y439R,L445R-myc</i>              | <i>h<sup>-</sup> his3-D1 ccq1<sup>+</sup>::5FLAG-kanMX6 tpz1-Y439R,L445R::13myc-kanMX6</i>                                            |
|        | 5 JH11248   | <i>ccq1-FLAG tpz1-Y439R,L445R,L449R-myc</i>        | <i>h<sup>+</sup> his3-D1 ccq1<sup>+</sup>::5FLAG-kanMX6 tpz1-Y439R,L445R,L449R-13myc-kanMX6</i>                                       |
| 3D     | 1 YTC9716   | <i>pot1-FLAG</i>                                   | <i>h<sup>+</sup> his3-D1 pot1<sup>+</sup>::3FLAG-kanMX</i>                                                                            |
|        | 2 JH11046   | <i>pot1-FLAG tpz1-myc</i>                          | <i>h<sup>-</sup> his3-D1 pot1<sup>+</sup>::3FLAG-kanMX tpz1<sup>+</sup>::13myc-kanMX6</i>                                             |
|        | 3 JH11176   | <i>pot1-FLAG tpz1-L449R-myc</i>                    | <i>h<sup>+</sup> pot1<sup>+</sup>::3FLAG-kanMX tpz1-L449R::13myc-kanMX6</i>                                                           |
|        | 4 JH11244   | <i>pot1-FLAG tpz1-Y439R,L445R-myc</i>              | <i>h<sup>+</sup> ade6-M210 his3-D1 pot1<sup>+</sup>::3FLAG-kanMX tpz1-Y439R,L445R::13myc-kanMX6</i>                                   |
|        | 5 JH11273   | <i>pot1-FLAG tpz1-Y439R,L445R,L449R-myc</i>        | <i>h<sup>-</sup> pot1<sup>+</sup>::3FLAG-kanMX tpz1-Y439R,L445R,L449R-13myc-kanMX6</i>                                                |
| 3E     | 1 TN7553    | <i>poz1-FLAG tpz1-myc</i>                          | <i>h<sup>-</sup> his3-D1 poz1<sup>+</sup>::5FLAG-TEV-Avitag-kanMX6 tpz1<sup>+</sup>::13myc-kanMX6</i>                                 |
|        | 2 JH11047   | <i>poz1-FLAG tpz1-[1-485]-myc</i>                  | <i>h<sup>+</sup> ade6-M210 his3-D1 poz1<sup>+</sup>::5FLAG-TEV-Avitag-kanMX6 tpz1-[1-485]::13myc-kanMX6</i>                           |
|        | 3 JH11200   | <i>poz1-FLAG tpz1-W498R,I501R-myc</i>              | <i>h<sup>+</sup> ade6-M216 his3-D1 poz1<sup>+</sup>::5FLAG-TEV-Avitag-kanMX6 tpz1-W498R,I501R::13myc-kanMX6</i>                       |
|        | 4 TN7196    | <i>tpz1-myc</i>                                    | <i>h<sup>-</sup> his3-D1 tpz1<sup>+</sup>::13myc-kanMX6</i>                                                                           |
| 3F     | 1 TN6770    | <i>ccq1-FLAG</i>                                   | <i>h<sup>+</sup> his3-D1 ccq1<sup>+</sup>::5FLAG-kanMX6</i>                                                                           |
|        | 2 TN7505    | <i>ccq1-FLAG tpz1-myc</i>                          | <i>h<sup>+</sup> his3-D1 ccq1<sup>+</sup>::5FLAG-kanMX6 tpz1<sup>+</sup>::13myc-kanMX6</i>                                            |
|        | 3 JH10926   | <i>ccq1-FLAG tpz1-[1-485]-myc</i>                  | <i>h<sup>-</sup> his3-D1 ccq1<sup>+</sup>::5FLAG-kanMX6 tpz1-[1-485]::13myc-kanMX6</i>                                                |
|        | 4 JH11203   | <i>ccq1-FLAG tpz1-W498R,I501R-myc</i>              | <i>h<sup>-</sup> his3-D1 ccq1<sup>+</sup>::5FLAG-kanMX6 tpz1-W498R,I501R::13myc-kanMX6</i>                                            |
| 3G     | 1 YTC9716   | <i>pot1-FLAG</i>                                   | <i>h<sup>+</sup> his3-D1 pot1<sup>+</sup>::3FLAG-kanMX</i>                                                                            |
|        | 2 JH11046   | <i>pot1-FLAG tpz1-myc</i>                          | <i>h<sup>-</sup> his3-D1 pot1<sup>+</sup>::3FLAG-kanMX tpz1<sup>+</sup>::13myc-kanMX6</i>                                             |
|        | 3 JH10929   | <i>pot1-FLAG tpz1-[1-485]-myc</i>                  | <i>h<sup>+</sup> his3-D1 pot1<sup>+</sup>::3FLAG-kanMX tpz1-[1-485]::13myc-kanMX6</i>                                                 |
|        | 4 JH11196   | <i>pot1-FLAG tpz1-W498R,I501R-myc</i>              | <i>h<sup>+</sup> pot1<sup>+</sup>::3FLAG-kanMX tpz1-W498R,I501R::13myc-kanMX6</i>                                                     |
| 4A     | 1 CF484     | <i>tpz1<sup>+</sup>/tpz1<sup>+</sup></i>           | <i>h<sup>+</sup>/h<sup>-</sup> ade6-M210/ade6-M216 his3-D1/his3-D1</i>                                                                |
|        | 2,16 TN2411 | <i>tpz1<sup>+</sup></i>                            | <i>h<sup>-</sup> his3-D1</i>                                                                                                          |
|        | 3 JH11365   | <i>tpz1<sup>+</sup>/tpz1-myc</i>                   | <i>h<sup>+</sup>/h<sup>-</sup> ade6-M210/ade6-M216 his3-D1/his3-D1 tpz1<sup>+</sup>/tpz1<sup>+</sup>::13myc-kanMX6</i>                |
|        | 4,15 TN7196 | <i>tpz1-myc</i>                                    | <i>h<sup>-</sup> his3-D1 tpz1<sup>+</sup>::13myc-kanMX6</i>                                                                           |
|        | 5 JH11306   | <i>tpz1<sup>+</sup>/tpz1-L449R-myc</i>             | <i>h<sup>+</sup>/h<sup>-</sup> ade6-M210/ade6-M216 his3<sup>+</sup>/his3-D1 tpz1<sup>+</sup>/tpz1-L449R::13myc-kanMX6</i>             |
|        | 6 JH11835   | <i>tpz1-L449R-myc (2x)</i>                         | <i>h<sup>+</sup> ade6-M210 his3-D1 tpz1-L449R::13myc-kanMX6 (2x restreaks)</i>                                                        |
|        | 7 JH12260   | <i>tpz1-L449R-myc (5x)</i>                         | <i>h<sup>+</sup> ade6-M210 his3-D1 tpz1-L449R::13myc-kanMX6 (5x restreaks)</i>                                                        |
|        | 8 JH11495   | <i>tpz1<sup>+</sup>/tpz1-Y439R,L445R-myc</i>       | <i>h<sup>+</sup>/h<sup>-</sup> ade6-M210/ade6-M216 his3<sup>+</sup>/his3-D1 tpz1<sup>+</sup>/tpz1-L439R,L445R::13myc-kanMX6</i>       |
|        | 9 JH11496   | <i>tpz1-Y439R,L445R-myc (2x)</i>                   | <i>h<sup>-</sup> ade6-M210 his3-D1 tpz1-L439R,L445R::13myc-kanMX6 (2x restreaks)</i>                                                  |
|        | 10 JH12261  | <i>tpz1-Y439R,L445R-myc (5x)</i>                   | <i>h<sup>-</sup> ade6-M210 his3-D1 tpz1-L439R,L445R::13myc-kanMX6 (5x restreaks)</i>                                                  |
|        | 11 JH11500  | <i>tpz1<sup>+</sup>/tpz1-Y439R,L445R,L449R-myc</i> | <i>h<sup>+</sup>/h<sup>-</sup> ade6-M210/ade6-M216 his3<sup>+</sup>/his3-D1 tpz1<sup>+</sup>/tpz1-L439R,L445R,L449R::13myc-kanMX6</i> |
|        | 12 JH11501  | <i>tpz1-Y439R,L445R,L449R-myc (2x)</i>             | <i>h<sup>-</sup> ade6-M216 his3-D1 tpz1-L439R,L445R,L449R::13myc-kanMX6 (2x restreaks)</i>                                            |
|        | 13 JH12262  | <i>tpz1-Y439R,L445R,L449R-myc (5x)</i>             | <i>h<sup>-</sup> ade6-M216 his3-D1 tpz1-L439R,L445R,L449R::13myc-kanMX6 (5x restreaks)</i>                                            |
|        | 14 TN9009   | <i>tpz1-myc ccq1Δ</i>                              | <i>h<sup>+</sup> his3-D1 tpz1-13myc:KanMX6 ccq1Δ::hphMX</i>                                                                           |

**Characterization of fission yeast shelterin**  
Harland *et al.*

| Figure    | Strain        | Full Genotype <sup>a</sup>                                                 |                                                                                                                                                     |
|-----------|---------------|----------------------------------------------------------------------------|-----------------------------------------------------------------------------------------------------------------------------------------------------|
| 4B        | 1 TN11289     | <i>tpz1</i> <sup>+</sup>                                                   | <i>h</i> <sup>-</sup> <i>his3-D1 tpz1</i> <sup>+</sup> :: <i>hphMX</i>                                                                              |
|           | 2 CF448       | <i>trt1Δ</i>                                                               | <i>h</i> <sup>-</sup> <i>ade6-M210 his3-D1 trt1Δ</i> :: <i>his3</i> <sup>+</sup>                                                                    |
|           | 3 TN9258      | <i>ccq1Δ</i>                                                               | <i>h</i> <sup>-</sup> <i>his3-D1 ccq1Δ</i> :: <i>hphMX</i> (linear)                                                                                 |
|           | 4 TN9259      | <i>ccq1Δ</i>                                                               | <i>h</i> <sup>-</sup> <i>his3-D1 ccq1Δ</i> :: <i>hphMX</i> (circular)                                                                               |
|           | 5 JH12993     | <i>tpz1-L449R</i>                                                          | <i>h</i> <sup>?</sup> <i>ade6-M210 or M216 his3-D1 tpz1-L449R</i> :: <i>hphMX</i>                                                                   |
|           | 6 JH12995     | <i>tpz1-L449R</i>                                                          | <i>h</i> <sup>?</sup> <i>ade6-M210 or M216 his3-D1 tpz1-L449R</i> :: <i>hphMX</i>                                                                   |
|           | 7 JH12986     | <i>tpz1-Y439R,L445R</i>                                                    | <i>h</i> <sup>?</sup> <i>ade6-M210 or M216 his3-D1 tpz1-Y439R,L445R</i> :: <i>hphMX</i>                                                             |
|           | 8 JH12988     | <i>tpz1-Y439R,L445R</i>                                                    | <i>h</i> <sup>?</sup> <i>ade6-M210 or M216 his3-D1 tpz1-Y439R,L445R</i> :: <i>hphMX</i>                                                             |
|           | 9 JH12990     | <i>tpz1-Y439R,L445R,L449R</i>                                              | <i>h</i> <sup>?</sup> <i>ade6-M210 or M216 his3-D1 tpz1-Y439R,L445R,L449R</i> :: <i>hphMX</i>                                                       |
|           | 10 JH12992    | <i>tpz1-Y439R,L445R,L449R</i>                                              | <i>h</i> <sup>?</sup> <i>ade6-M210 or M216 his3-D1 tpz1-Y439R,L445R,L449R</i> :: <i>hphMX</i>                                                       |
| 4C        | 1,7,13 TN2411 | <i>tpz1</i> <sup>+</sup> <i>ccq1</i> <sup>+</sup> <i>poz1</i> <sup>+</sup> | <i>h</i> <sup>-</sup> <i>his3-D1</i>                                                                                                                |
|           | 2 TN7196      | <i>tpz1-myc</i>                                                            | <i>h</i> <sup>-</sup> <i>his3-D1 tpz1</i> <sup>+</sup> ::13myc-kanMX6                                                                               |
|           | 3 JH12998     | <i>tpz1-L449R-myc</i>                                                      | <i>h</i> <sup>-</sup> <i>ade6-M216 his3-D1 tpz1-L449R</i> ::13myc-kanMX6                                                                            |
|           | 4 JH13002     | <i>ccq1Δ</i>                                                               | <i>h</i> <sup>-</sup> <i>his3-D1 ccq1Δ</i> :: <i>hphMX</i>                                                                                          |
|           | 5 TN9009      | <i>ccq1Δ tpz1-myc</i>                                                      | <i>h</i> <sup>+</sup> <i>his3-D1 ccq1Δ</i> :: <i>hphMX tpz1</i> <sup>+</sup> ::13myc-kanMX6                                                         |
|           | 6 JH11684     | <i>ccq1Δ tpz1-L449R-myc</i>                                                | <i>h</i> <sup>+</sup> <i>his3-D1 ccq1Δ</i> :: <i>hphMX tpz1-L449R</i> -13myc-kanMX6                                                                 |
|           | 8 JH12999     | <i>poz1Δ</i>                                                               | <i>h</i> <sup>-</sup> <i>ade6-M216 his3-D1 poz1Δ</i> :: <i>natMX6</i>                                                                               |
|           | 9 TN9254      | <i>poz1Δ ccq1Δ</i>                                                         | <i>h</i> <sup>-</sup> <i>his3-D1 poz1Δ</i> :: <i>natMX6 ccq1Δ</i> :: <i>hphMX</i>                                                                   |
|           | 10 YTC9366    | <i>poz1Δ tpz1-myc</i>                                                      | <i>h</i> <sup>-</sup> <i>his3-D1 poz1Δ</i> :: <i>natMX6 tpz1</i> <sup>+</sup> ::13myc-kanMX6                                                        |
|           | 11 JH11701    | <i>poz1Δ ccq1Δ tpz1-myc</i>                                                | <i>h</i> <sup>+</sup> <i>his3-D1 poz1Δ</i> :: <i>natMX6 ccq1Δ</i> :: <i>hphMX tpz1</i> <sup>+</sup> ::13myc-kanMX6                                  |
|           | 12 JH11686    | <i>poz1Δ tpz1-L449R-myc</i>                                                | <i>h</i> <sup>-</sup> <i>ade6-M216 his3-D1 poz1Δ</i> :: <i>natMX6 tpz1-L449R</i> ::13myc-kanMX6                                                     |
|           | 4D            | 1 TN7196                                                                   | <i>tpz1-myc</i>                                                                                                                                     |
| 2 YTC9366 |               | <i>poz1Δ tpz1-myc</i>                                                      | <i>h</i> <sup>-</sup> <i>his3-D1 poz1Δ</i> :: <i>natMX6 tpz1</i> <sup>+</sup> ::13myc-kanMX6                                                        |
| 3 TN9009  |               | <i>ccq1Δ tpz1-myc</i>                                                      | <i>h</i> <sup>+</sup> <i>his3-D1 ccq1Δ</i> :: <i>hphMX tpz1</i> <sup>+</sup> ::13myc-kanMX6                                                         |
| 4 JH11701 |               | <i>poz1Δ ccq1Δ tpz1-myc</i>                                                | <i>h</i> <sup>+</sup> <i>his3-D1 poz1Δ</i> :: <i>natMX6 ccq1Δ</i> :: <i>hphMX tpz1</i> <sup>+</sup> ::13myc-kanMX6                                  |
| 5 JH11835 |               | <i>tpz1-L449R-myc</i>                                                      | <i>h</i> <sup>+</sup> <i>ade6-M210 his3-D1 tpz1-L449R</i> ::13myc-kanMX6                                                                            |
| 6 JH11686 |               | <i>poz1Δ tpz1-L449R-myc</i>                                                | <i>h</i> <sup>-</sup> <i>ade6-M216 his3-D1 poz1Δ</i> :: <i>natMX6 tpz1-L449R</i> ::13myc-kanMX6                                                     |
| 7 JK11683 |               | <i>ccq1Δ tpz1-L449R-myc</i>                                                | <i>h</i> <sup>+</sup> <i>his3-D1 ccq1Δ</i> :: <i>hphMX tpz1-L449R</i> ::13myc-kanMX6                                                                |
| 5A        | 1 TN2411      | <i>tpz1</i> <sup>+</sup> (no tag)                                          | <i>h</i> <sup>-</sup> <i>his3-D1</i>                                                                                                                |
|           | 2 TN7196      | <i>tpz1-myc</i>                                                            | <i>h</i> <sup>-</sup> <i>his3-D1 tpz1</i> <sup>+</sup> ::13myc-kanMX6                                                                               |
|           | 3 TN9009      | <i>tpz1-myc ccq1Δ</i>                                                      | <i>h</i> <sup>+</sup> <i>his3-D1 tpz1</i> <sup>+</sup> ::13myc-kanMX6 <i>ccq1Δ</i> :: <i>hphMX</i>                                                  |
|           | 4 JH11835     | <i>tpz1-L449R-myc</i>                                                      | <i>h</i> <sup>+</sup> <i>ade6-M210 his3-D1 tpz1-L449R</i> ::13myc-kanMX6                                                                            |
|           | 5 JH11496     | <i>tpz1-Y439R,L445R-myc</i>                                                | <i>h</i> <sup>-</sup> <i>ade6-M210 his3-D1 tpz1-L439R,L445R</i> ::13myc-kanMX6                                                                      |
|           | 6 JH11232     | <i>tpz1-Y439R,L445R,L449R-myc</i>                                          | <i>h</i> <sup>+</sup> <i>ade6-M210 his3-D1 tpz1-Y439R,L445R,L449R</i> ::13myc-kanMX6                                                                |
| 5B        | 1 JH11289     | <i>ccq1</i> <sup>+</sup> (no tag)                                          | <i>h</i> <sup>-</sup> <i>his3-D1 tpz1</i> <sup>+</sup> :: <i>hphMX</i>                                                                              |
|           | 2 JH11569     | <i>ccq1-myc</i>                                                            | <i>h</i> <sup>+</sup> <i>his3-D1 ccq1</i> <sup>+</sup> ::13myc-kanMX6 <i>tpz1</i> <sup>+</sup> :: <i>hphMX</i>                                      |
|           | 3 JH11622     | <i>ccq1-myc tpz1-L449R</i>                                                 | <i>h</i> <sup>+</sup> <i>his3-D1 ccq1</i> <sup>+</sup> ::13myc-kanMX6 <i>tpz1-L449R</i> :: <i>hphMX</i>                                             |
|           | 4 JH11452     | <i>ccq1-myc tpz1-Y439R,L445R</i>                                           | <i>h</i> <sup>+</sup> <i>his3-D1 ccq1</i> <sup>+</sup> ::13myc-kanMX6 <i>tpz1-Y439R,L445R</i> :: <i>hphMX</i>                                       |
|           | 5 JH11609     | <i>ccq1-myc tpz1-Y439R,L445R,L449R</i>                                     | <i>h</i> <sup>+</sup> <i>his3-D1 ccq1</i> <sup>+</sup> ::13myc-kanMX6 <i>tpz1-Y439R,L445R,L449R</i> :: <i>hphMX</i>                                 |
| 5C        | 1 JH11289     | <i>trt1</i> <sup>+</sup> (no tag)                                          | <i>h</i> <sup>-</sup> <i>his3-D1 tpz1</i> <sup>+</sup> :: <i>hphMX</i>                                                                              |
|           | 2 JH11630     | <i>trt1-myc</i>                                                            | <i>h</i> <sup>-</sup> <i>ade6-M216 his3-D1 trt1</i> <sup>+</sup> :: <i>G<sub>8</sub>-13myc-kanMX6 tpz1</i> <sup>+</sup> :: <i>hphMX</i>             |
|           | 3 JH11626     | <i>trt1-myc tpz1-L449R</i>                                                 | <i>h</i> <sup>-</sup> <i>ade6-M216 his3-D1 trt1</i> <sup>+</sup> :: <i>G<sub>8</sub>-13myc-kanMX6 tpz1-L449R</i> :: <i>hphMX</i>                    |
|           | 4 JH11449     | <i>trt1-myc tpz1-Y439R,L445R</i>                                           | <i>h</i> <sup>+</sup> <i>ade6-M210 his3-D1 trt1</i> <sup>+</sup> :: <i>G<sub>8</sub>-13myc-kanMX6 tpz1-Y439R,L445R</i> :: <i>hphMX</i>              |
|           | 5 JH11611     | <i>trt1-myc tpz1-Y439R,L445R,L449R</i>                                     | <i>h</i> <sup>-</sup> <i>ade6-M210 his3-D1 trt1</i> <sup>+</sup> :: <i>G<sub>8</sub>-13myc-kanMX6 tpz1-Y439R,L445R,L449R</i> :: <i>hphMX</i>        |
|           | 6 JH11644     | <i>trt1-myc ccq1Δ</i>                                                      | <i>h</i> <sup>+</sup> <i>his3-D1 trt1</i> <sup>+</sup> :: <i>G<sub>8</sub>-13myc-kanMX6 tpz1</i> <sup>+</sup> :: <i>hphMX ccq1Δ</i> :: <i>hphMX</i> |
| 5D        | 1 TN6770      | <i>ccq1-FLAG</i>                                                           | <i>h</i> <sup>+</sup> <i>his3-D1 ccq1</i> <sup>+</sup> ::5FLAG-kanMX6                                                                               |
|           | 2 TN10988     | <i>trt1Δ ccq1-FLAG</i>                                                     | <i>h</i> <sup>-</sup> <i>ade6-M210 his3-D1 trt1Δ</i> :: <i>his3</i> <sup>+</sup> <i>ccq1</i> <sup>+</sup> ::5FLAG-kanMX6                            |
|           | 3 TN10991     | <i>trt1Δ ccq1-T93A-FLAG</i>                                                | <i>h</i> <sup>-</sup> <i>ade6-M210 his3-D1 trt1Δ</i> :: <i>his3</i> <sup>+</sup> <i>ccq1-T93A</i> ::5FLAG-kanMX6                                    |
|           | 4 JH11174     | <i>ccq1-FLAG tpz1-L449R-myc</i>                                            | <i>h</i> <sup>-</sup> <i>ccq1</i> <sup>+</sup> ::5FLAG-kanMX6 <i>tpz1-L449R</i> ::13myc-kanMX6                                                      |
|           | 5 JH11238     | <i>ccq1-FLAG tpz1-Y439R,L445R-myc</i>                                      | <i>h</i> <sup>-</sup> <i>his3-D1 ccq1</i> <sup>+</sup> ::5FLAG-kanMX6 <i>tpz1-Y439R,L445R</i> ::13myc-kanMX6                                        |
|           | 6 JH11248     | <i>ccq1-FLAG tpz1-Y439R,L445R,L449R-myc</i>                                | <i>h</i> <sup>+</sup> <i>his3-D1 ccq1</i> <sup>+</sup> ::5FLAG-kanMX6 <i>tpz1-Y439R,L445R,L449R</i> -13myc-kanMX6                                   |

**Characterization of fission yeast shelterin**  
Harland *et al.*

| Figure | Strain     | Full Genotype <sup>a</sup>                                                                                                                                                |
|--------|------------|---------------------------------------------------------------------------------------------------------------------------------------------------------------------------|
| 5E     | 1 TN6770   | <i>ccq1-FLAG</i> <i>h<sup>+</sup> his3-D1 ccq1<sup>+</sup>::5FLAG-kanMX6</i>                                                                                              |
|        | 2 TN10535  | <i>rap1Δ ccq1-FLAG</i> <i>h<sup>-</sup> his3-D1 rap1Δ::ura4<sup>+</sup> ccq1<sup>+</sup>::5FLAG-kanMX6</i>                                                                |
|        | 3 BAM10829 | <i>rap1Δ ccq1-T93A-FLAG</i> <i>h<sup>-</sup> his3-D1 rap1Δ::ura4<sup>+</sup> ccq1-T93A::5FLAG-kanMX6</i>                                                                  |
|        | 4 JH11544  | <i>rap1Δ tpz1-L449R-myc ccq1-FLAG</i> <i>h<sup>-</sup> his3-D1 rap1Δ::ura4<sup>+</sup> tpz1-L449R-13myc-kanMX6 ccq1<sup>+</sup>::5FLAG-kanMX6</i>                         |
|        | 5 JH11546  | <i>rap1Δ tpz1-Y439R,L445R-myc ccq1-FLAG</i> <i>h<sup>-</sup> his3-D1 rap1Δ::ura4<sup>+</sup> tpz1-Y439R,L445R-13myc-kanMX6 ccq1<sup>+</sup>::5FLAG-kanMX6</i>             |
|        | 6 JH11548  | <i>rap1Δ tpz1-Y439R,L445R,L449R-myc ccq1-FLAG</i> <i>h<sup>+</sup> his3-D1 rap1Δ::ura4<sup>+</sup> tpz1-Y439R,L445R,L449R-13myc-kanMX6 ccq1<sup>+</sup>::5FLAG-kanMX6</i> |
| 6A     | 1 JH11365  | <i>tpz1<sup>+</sup>/tpz1-myc</i> <i>h<sup>+</sup>/h<sup>-</sup> ade6-M210/ade6-M216 his3-D1/his3-D1 tpz1<sup>+</sup>/tpz1<sup>-</sup>::13myc-kanMX6</i>                   |
|        | 2 JH11715  | <i>tpz1<sup>+</sup>/tpz1-[1-485]-myc</i> <i>h<sup>+</sup>/h<sup>-</sup> ade6-M210/ade6-M216 his3-D1/his3-D1 tpz1<sup>+</sup>/tpz1-[1-485]::13myc-kanMX6</i>               |
|        | 3 JH11189  | <i>tpz1<sup>+</sup>/tpz1-W498R,I501R-myc</i> <i>h<sup>+</sup>/h<sup>-</sup> ade6-M210/ade6-M216 his3-D1/his3-D1 tpz1<sup>+</sup>/tpz1-W498R,I501R::13myc-kanMX6</i>       |
|        | 4 TN2411   | <i>tpz1<sup>+</sup></i> <i>h<sup>-</sup> his3-D1</i>                                                                                                                      |
|        | 5 TN7196   | <i>tpz1-myc</i> <i>h<sup>-</sup> his3-D1 tpz1<sup>+</sup>::13myc-kanMX6</i>                                                                                               |
|        | 6 JH13000  | <i>poz1Δ</i> <i>h<sup>-</sup> ade6-M216 his3-D1 poz1Δ::natMX6</i>                                                                                                         |
|        | 7 YTC9366  | <i>tpz1-myc poz1Δ</i> <i>h<sup>-</sup> his3-D1 tpz1<sup>+</sup>::13myc-kanMX6 poz1Δ::natMX6</i>                                                                           |
|        | 8 JH10923  | <i>tpz1-[1-485]-myc</i> <i>h<sup>-</sup> ade6-M210 his3-D1 tpz1-[1-485]::13myc-kanMX6</i>                                                                                 |
|        | 9 JH13004  | <i>tpz1-W498R,I501R-myc</i> <i>h<sup>+</sup> ade6-M216 his3-D1 tpz1-W498R,I501R::13myc-kanMX6</i>                                                                         |
|        | 10 JH11693 | <i>tpz1-W498R,I501R-myc poz1Δ</i> <i>h<sup>-</sup> ade6-M216 his3-D1 tpz1-W498R,I501R::13myc-kanMX6 poz1Δ::natMX6</i>                                                     |
|        | 11 JH11689 | <i>tpz1-W498R,I501R-myc ccq1Δ</i> <i>h<sup>-</sup> his3-D1 tpz1-W498R,I501R::13myc-kanMX6 ccq1Δ::hphMX</i>                                                                |
|        | 12 JH11701 | <i>tpz1-myc poz1Δ ccq1Δ</i> <i>h<sup>+</sup> his3-D1 tpz1<sup>+</sup>::13myc-kanMX6 poz1Δ::natMX6 ccq1Δ::hphMX</i>                                                        |
| 6B     | 1 TN7196   | <i>tpz1-myc</i> <i>h<sup>-</sup> his3-D1 tpz1<sup>+</sup>::13myc-kanMX6</i>                                                                                               |
|        | 2 JH11190  | <i>tpz1-W498R,I501R-myc</i> <i>h<sup>+</sup> leu1-32 ura4-D18 ade6-M216 his3-D1 tpz1-W498R,I501R::13myc-kanMX6</i>                                                        |
|        | 3 JH11692  | <i>tpz1-W498R,I501R-myc poz1Δ</i> <i>h<sup>-</sup> leu1-32 ura4-D18 ade6-M216 his3-D1 tpz1-W498R,I501R::13myc-kanMX6 poz1Δ::natMX6</i>                                    |
|        | 4 JH11689  | <i>tpz1-W498R,I501R-myc ccq1Δ</i> <i>h<sup>-</sup> his3-D1 tpz1-W498R,I501R::13myc-kanMX6 ccq1Δ::hphMX</i>                                                                |
|        | 5 JH11701  | <i>tpz1-myc poz1Δ ccq1Δ</i> <i>h<sup>+</sup> his3-D1 tpz1<sup>+</sup>::13myc-kanMX6 poz1Δ::natMX6 ccq1Δ::hphMX</i>                                                        |
| 6C     | 1,8 TN2411 | <i>tpz1<sup>+</sup></i> <i>h<sup>-</sup> his3-D1</i>                                                                                                                      |
|        | 2 TN7196   | <i>tpz1-myc</i> <i>h<sup>-</sup> his3-D1 tpz1<sup>+</sup>::13myc-kanMX6</i>                                                                                               |
|        | 3 JH11835  | <i>tpz1-L449R-myc</i> <i>h<sup>+</sup> ade6-M210 his3-D1 tpz1-L449R::13myc-kanMX6</i>                                                                                     |
|        | 4 JH10922  | <i>tpz1-[1-485]-myc</i> <i>h<sup>-</sup> ade6-M210 his3-D1 tpz1-[1-485]::13myc-kanMX6</i>                                                                                 |
|        | 5 JH11790  | <i>tpz1-[1-485]-L449R-myc</i> <i>h<sup>-</sup> ade6-M216 his3-D1 tpz1-[1-485]-L449R::13myc-kanMX6</i>                                                                     |
|        | 6 JH11190  | <i>tpz1-W498R,I501R-myc</i> <i>h<sup>+</sup> ade6-M216 his3-D1 tpz1-W498R,I501R::13myc-kanMX6</i>                                                                         |
|        | 7 JH11781  | <i>tpz1-L449R,W498R,I501R-myc</i> <i>h<sup>+</sup> ade6-M216 his3-D1 tpz1-L449R,W498R,I501R::13myc-kanMX6</i>                                                             |
| 6D     | 1 JH11835  | <i>tpz1-L449R-myc</i> <i>h<sup>+</sup> ade6-M210 his3-D1 tpz1-L449R::13myc-kanMX6</i>                                                                                     |
|        | 2 JH10922  | <i>tpz1-[1-485]-myc</i> <i>h<sup>-</sup> ade6-M210 his3-D1 tpz1-[1-485]::13myc-kanMX6</i>                                                                                 |
|        | 3 JH11790  | <i>tpz1-[1-485]-L449R-myc</i> <i>h<sup>-</sup> ade6-M216 his3-D1 tpz1-[1-485]-L449R::13myc-kanMX6</i>                                                                     |
|        | 4 JH11190  | <i>tpz1-W498R,I501R-myc</i> <i>h<sup>+</sup> ade6-M216 his3-D1 tpz1-W498R,I501R::13myc-kanMX6</i>                                                                         |
|        | 5 JH11781  | <i>tpz1-L449R,W498R,I501R-myc</i> <i>h<sup>+</sup> ade6-M216 his3-D1 tpz1-L449R,W498R,I501R::13myc-kanMX6</i>                                                             |
| 7A     | 1 TN7196   | <i>tpz1-myc</i> <i>h<sup>-</sup> his3-D1 tpz1<sup>+</sup>::13myc-kanMX6</i>                                                                                               |
|        | 2 YTC9366  | <i>tpz1-myc poz1Δ</i> <i>h<sup>-</sup> his3-D1 tpz1<sup>+</sup>::13myc-kanMX6 poz1Δ::natMX6</i>                                                                           |
|        | 3 JH11191  | <i>tpz1-W498R,I501R-myc</i> <i>h<sup>+</sup> ade6-M216 his3-D1 tpz1-W498R,I501R::13myc-kanMX6</i>                                                                         |
|        | 4 JH11692  | <i>tpz1-W498R,I501R-myc poz1Δ</i> <i>h<sup>-</sup> ade6-M216 his3-D1 tpz1-W498R,I501R::13myc-kanMX6 poz1Δ::natMX6</i>                                                     |
| 7B     | 1 TN7217   | <i>ccq1-myc</i> <i>h<sup>-</sup> his3-D1 ccq1<sup>+</sup>::13myc-kanMX6</i>                                                                                               |
|        | 2 YTC8712  | <i>ccq1-myc poz1Δ</i> <i>h<sup>+</sup> his3-D1 ccq1<sup>+</sup>::13myc-kanMX6 poz1Δ::natMX6</i>                                                                           |
|        | 3 JH12895  | <i>ccq1-myc tpz1-W498R,I501R</i> <i>h<sup>+</sup> his3-D1 ccq1<sup>+</sup>::13myc-kanMX6 tpz1-W498R,I501R::hphMX</i>                                                      |
|        | 4 JH12897  | <i>ccq1-myc tpz1-W498R,I501R poz1Δ</i> <i>h<sup>-</sup> his3-D1 ccq1<sup>+</sup>::13myc-kanMX6 tpz1-W498R,I501R::hphMX poz1Δ::natMX6</i>                                  |

**Characterization of fission yeast shelterin**  
Harland *et al.*

| Figure | Strain       | Full Genotype <sup>a</sup>                                                                                                                                     |
|--------|--------------|----------------------------------------------------------------------------------------------------------------------------------------------------------------|
| 7C     | 1 JH12265    | <i>poz1-myc</i> <i>h<sup>+</sup> his3-D1 poz1<sup>+</sup>::13myc-kanMX6 tpz1<sup>+</sup>::hphMX</i>                                                            |
|        | 2 JH12267    | <i>poz1-myc rap1Δ</i> <i>h<sup>+</sup> his3-D1 poz1<sup>+</sup>::13myc-kanMX6 tpz1<sup>+</sup>::hphMX rap1Δ::ura4<sup>+</sup></i>                              |
|        | 3 JH12659    | <i>poz1-myc tpz1-W498R,I501R</i> <i>h<sup>+</sup> ade6-M210 his3-D1 poz1<sup>+</sup>::13myc-kanMX6 tpz1-W498R,I501R::hphMX</i>                                 |
|        | 4 JH12056    | <i>poz1-myc tpz1-W498R,I501R rap1Δ</i> <i>h<sup>+</sup> ade6-M210 his3-D1 poz1<sup>+</sup>::13myc-kanMX6 tpz1-W498R,I501R::hphMX rap1Δ::ura4<sup>+</sup></i>   |
| 7D     | 1 JH11630    | <i>trt1-myc</i> <i>h<sup>-</sup> ade6-M216 his3-D1 trt1<sup>+</sup>::G<sub>8</sub>-13myc-kanMX6 tpz1<sup>+</sup>::hphMX</i>                                    |
|        | 2 JH12770    | <i>trt1-myc poz1Δ</i> <i>h<sup>-</sup> ade6-M216 his3-D1 trt1<sup>+</sup>::G<sub>8</sub>-13myc-kanMX6 tpz1<sup>+</sup>::hphMX poz1Δ::natMX6</i>                |
|        | 3 JH12766    | <i>trt1-myc tpz1-W498R,I501R</i> <i>h<sup>-</sup> his3-D1 trt1<sup>+</sup>::G<sub>8</sub>-13myc-kanMX6 tpz1-W498R,I501R::hphMX</i>                             |
| 7E     | 1 TN6770     | <i>ccq1-FLAG</i> <i>h<sup>+</sup> his3-D1 ccq1<sup>+</sup>::5FLAG-kanMX6</i>                                                                                   |
|        | 2 TN10531    | <i>ccq1-FLAG poz1Δ</i> <i>h<sup>-</sup> his3-D1 ccq1<sup>+</sup>::5FLAG-kanMX6 poz1Δ::natMX6</i>                                                               |
|        | 3 TN12036    | <i>ccq1-T93A-FLAG poz1Δ</i> <i>h<sup>-</sup> his3-D1 ccq1-T93A::5FLAG-kanMX6 poz1Δ::natMX6</i>                                                                 |
|        | 4 JH10926    | <i>ccq1-FLAG tpz1-[1-485]-myc</i> <i>h<sup>-</sup> his3-D1 ccq1<sup>+</sup>::5FLAG-kanMX6 tpz1-[1-485]:13myc-kanMX6</i>                                        |
|        | 5 JH11203    | <i>ccq1-FLAG tpz1-W498R,I501R-myc</i> <i>h<sup>-</sup> his3-D1 ccq1<sup>+</sup>::5FLAG-kanMX6 tpz1-W498R,I501R::13myc-kanMX6</i>                               |
|        | 6 JH11772    | <i>ccq1-FLAG tpz1-W498R,I501R-myc poz1Δ</i> <i>h<sup>+</sup> ade6-M216 his3-D1 ccq1<sup>+</sup>::5FLAG-kanMX6 tpz1-W498R,I501R::13myc-kanMX6 poz1Δ::natMX6</i> |
| S3A    | 1,5 TN6770   | <i>ccq1-FLAG</i> <i>h<sup>+</sup> his3-D1 ccq1<sup>+</sup>::5FLAG-kanMX6</i>                                                                                   |
|        | 2,6 TN7505   | <i>ccq1-FLAG tpz1-myc</i> <i>h<sup>+</sup> his3-D1 ccq1<sup>+</sup>::5FLAG-kanMX6 tpz1<sup>+</sup>::13myc-kanMX6</i>                                           |
|        | 3,7 JH11174  | <i>ccq1-FLAG tpz1-L449R-myc</i> <i>h<sup>-</sup> ccq1<sup>+</sup>::5FLAG-kanMX6 tpz1-L449R::13myc-kanMX6</i>                                                   |
|        | 4,8 JH12780  | <i>ccq1-FLAG tpz1-L449A-myc</i> <i>h<sup>-</sup> his3-D1 ccq1<sup>+</sup>::5FLAG-kanMX6 tpz1-L449A::13myc-kanMX6</i>                                           |
| S3B    | 1 TN14536    | <i>tpz1<sup>+</sup>/tpz1-L449A</i> <i>h<sup>+</sup>/h<sup>-</sup> ade6-M210/ade6-M216 his3-D1/his3-D1 tpz1<sup>+</sup>/tpz1-L449A::hphMX</i>                   |
|        | 2 TN14539    | <i>tpz1-L449A (2x)</i> <i>h<sup>-</sup> ade6-M216 his3-D1 tpz1-L449A::hphMX (2x restreaks)</i>                                                                 |
|        | 3 TN14577    | <i>tpz1-L449A (5x)</i> <i>h<sup>-</sup> ade6-M216 his3-D1 tpz1-L449A::hphMX (5x restreaks)</i>                                                                 |
|        | 4 TN14540    | <i>tpz1-L449A (2x)</i> <i>h<sup>-</sup> ade6-M216 his3-D1 tpz1-L449A::hphMX (2x restreaks)</i>                                                                 |
|        | 5 TN14579    | <i>tpz1-L449A (5x)</i> <i>h<sup>-</sup> ade6-M216 his3-D1 tpz1-L449A::hphMX (5x restreaks)</i>                                                                 |
|        | 6 TN14541    | <i>tpz1-L449A (2x)</i> <i>h<sup>-</sup> ade6-M216 his3-D1 tpz1-L449A::hphMX (2x restreaks)</i>                                                                 |
|        | 7 TN14581    | <i>tpz1-L449A (5x)</i> <i>h<sup>-</sup> ade6-M216 his3-D1 tpz1-L449A::hphMX (5x restreaks)</i>                                                                 |
|        | 8 TN14542    | <i>tpz1-L449A (2x)</i> <i>h<sup>-</sup> ade6-M216 his3-D1 tpz1-L449A::hphMX (2x restreaks)</i>                                                                 |
|        | 9 TN14583    | <i>tpz1-L449A (5x)</i> <i>h<sup>-</sup> ade6-M216 his3-D1 tpz1-L449A::hphMX (5x restreaks)</i>                                                                 |
|        | 10 TN11289   | <i>tpz1<sup>+</sup></i> <i>h<sup>-</sup> his3-D1 tpz1<sup>+</sup>::hphMX</i>                                                                                   |
| S3C    | 1 TN11289    | <i>tpz1<sup>+</sup></i> <i>h<sup>-</sup> his3-D1 tpz1<sup>+</sup>::hphMX</i>                                                                                   |
|        | 2 TN14578    | <i>tpz1-L449A</i> <i>h<sup>-</sup> ade6-M216 his3-D1 tpz1-L449A::hphMX</i>                                                                                     |
|        | 3 TN14580    | <i>tpz1-L449A</i> <i>h<sup>-</sup> ade6-M216 his3-D1 tpz1-L449A::hphMX</i>                                                                                     |
|        | 4 TN14582    | <i>tpz1-L449A</i> <i>h<sup>-</sup> ade6-M216 his3-D1 tpz1-L449A::hphMX</i>                                                                                     |
|        | 5 TN14584    | <i>tpz1-L449A</i> <i>h<sup>-</sup> ade6-M216 his3-D1 tpz1-L449A::hphMX</i>                                                                                     |
| S3D    | 1,12 TN11289 | <i>tpz1<sup>+</sup></i> <i>h<sup>-</sup> his3-D1 tpz1<sup>+</sup>::hphMX</i>                                                                                   |
|        | 2 JH12999    | <i>poz1Δ</i> <i>h<sup>-</sup> ade6-M216 his3-D1 poz1Δ::natMX6</i>                                                                                              |
|        | 3 TN14539    | <i>tpz1-L449A</i> <i>h<sup>-</sup> ade6-M216 his3-D1 tpz1-L449A::hphMX</i>                                                                                     |
|        | 4 TN14540    | <i>tpz1-L449A</i> <i>h<sup>-</sup> ade6-M216 his3-D1 tpz1-L449A::hphMX</i>                                                                                     |
|        | 5 TN14574    | <i>tpz1-L449A poz1Δ</i> <i>h<sup>-</sup> ade6-M216 his3-D1 tpz1-L449A::hphMX poz1Δ::natMX6</i>                                                                 |
|        | 6 TN14575    | <i>tpz1-L449A poz1Δ</i> <i>h<sup>+</sup> his3-D1 tpz1-L449A::hphMX poz1Δ::natMX6</i>                                                                           |
|        | 7 TN14576    | <i>tpz1-L449A poz1Δ</i> <i>h<sup>-</sup> ade6-M216 his3-D1 tpz1-L449A::hphMX poz1Δ::natMX6</i>                                                                 |
|        | 8 JH11577    | <i>tpz1-L449R</i> <i>h<sup>+</sup> ade6-M216 his3-D1 tpz1-L449R::hphMX</i>                                                                                     |
|        | 9 TN14444    | <i>tpz1-L449R poz1Δ</i> <i>h<sup>-</sup> his3-D1 tpz1-L449R::hphMX poz1Δ::natMX6</i>                                                                           |
|        | 10 TN14445   | <i>tpz1-L449R poz1Δ</i> <i>h<sup>+</sup> ade6-M216 his3-D1 tpz1-L449R::hphMX poz1Δ::natMX6</i>                                                                 |
|        | 11 TN14446   | <i>tpz1-L449R poz1Δ</i> <i>h<sup>+</sup> ade6-M216 his3-D1 tpz1-L449R::hphMX poz1Δ::natMX6</i>                                                                 |
| S3E    | 1 TN11289    | <i>tpz1<sup>+</sup></i> <i>h<sup>-</sup> his3-D1 tpz1<sup>+</sup>::hphMX</i>                                                                                   |
|        | 2 TN14539    | <i>tpz1-L449A</i> <i>h<sup>-</sup> ade6-M216 his3-D1 tpz1-L449A::hphMX</i>                                                                                     |
|        | 3 TN14540    | <i>tpz1-L449A</i> <i>h<sup>-</sup> ade6-M216 his3-D1 tpz1-L449A::hphMX</i>                                                                                     |
|        | 4 TN14574    | <i>tpz1-L449A poz1Δ</i> <i>h<sup>-</sup> ade6-M216 his3-D1 tpz1-L449A::hphMX poz1Δ::natMX6</i>                                                                 |
|        | 5 TN14575    | <i>tpz1-L449A poz1Δ</i> <i>h<sup>+</sup> his3-D1 tpz1-L449A::hphMX poz1Δ::natMX6</i>                                                                           |
|        | 6 TN14576    | <i>tpz1-L449A poz1Δ</i> <i>h<sup>-</sup> ade6-M216 his3-D1 tpz1-L449A::hphMX poz1Δ::natMX6</i>                                                                 |
|        | 7 JH11577    | <i>tpz1-L449R</i> <i>h<sup>+</sup> ade6-M216 his3-D1 tpz1-L449R::hphMX</i>                                                                                     |
|        | 8 TN14444    | <i>tpz1-L449R poz1Δ</i> <i>h<sup>-</sup> his3-D1 tpz1-L449R::hphMX poz1Δ::natMX6</i>                                                                           |
|        | 9 TN14445    | <i>tpz1-L449R poz1Δ</i> <i>h<sup>+</sup> ade6-M216 his3-D1 tpz1-L449R::hphMX poz1Δ::natMX6</i>                                                                 |
|        | 10 TN14446   | <i>tpz1-L449R poz1Δ</i> <i>h<sup>+</sup> ade6-M216 his3-D1 tpz1-L449R::hphMX poz1Δ::natMX6</i>                                                                 |

**Characterization of fission yeast shelterin**  
Harland *et al.*

| Figure   | Strain         | Full Genotype <sup>a</sup>                                                    |                                                                                                                                                                                                            |
|----------|----------------|-------------------------------------------------------------------------------|------------------------------------------------------------------------------------------------------------------------------------------------------------------------------------------------------------|
| S4       | 1 TN2411       | <i>tpz1</i> <sup>+</sup>                                                      | <i>h</i> <sup>-</sup> <i>his3-D1</i>                                                                                                                                                                       |
|          | 2,14,15 TN7196 | <i>tpz1-myc</i>                                                               | <i>h</i> <sup>-</sup> <i>his3-D1 tpz1</i> <sup>+</sup> ::13myc-kanMX6                                                                                                                                      |
|          | 3-6 JH11181    | <i>tpz1-L449R-myc</i>                                                         | <i>h</i> <sup>-</sup> <i>ade6-M216 tpz1-L449R</i> ::13myc-kanMX6 (multiple 11x restreak single colonies derived from JH11181)                                                                              |
|          | 7,16,23 LK8667 | <i>ccq1Δ</i>                                                                  | <i>h</i> <sup>-</sup> <i>his3-D1 ccq1Δ</i> ::hphMX                                                                                                                                                         |
|          | 8-13 JH11218   | <i>tpz1-Y439R,L445R-myc</i>                                                   | <i>h</i> <sup>+</sup> <i>ade6-M210 his3-D1 tpz1-Y439R,L445R</i> ::13myc-kanMX6 (multiple 11x restreak single colonies derived from JH11218)                                                                |
|          | 17-22 JH11232  | <i>tpz1-Y439R,L445R,L449R-myc</i>                                             | <i>h</i> <sup>+</sup> <i>ade6-M210 his3-D1 tpz1-Y439R,L445R,L449R</i> ::13myc-kanMX6 (multiple 11x restreak single colonies derived from JH11232)                                                          |
| S5       | CF248          | <i>trt1</i> <sup>+</sup> / <i>trt1Δ</i>                                       | <i>h</i> <sup>+</sup> / <i>h</i> <sup>-</sup> <i>ade6-M210/ade6-M216 his3-D1/his3-D1 trt1</i> <sup>+</sup> / <i>trt1Δ</i> :: <i>his3</i> <sup>+</sup>                                                      |
|          | JH12706        | <i>trt1</i> <sup>+</sup> / <i>trt1Δ ccq1</i> <sup>+</sup> / <i>ccq1Δ</i>      | <i>h</i> <sup>+</sup> / <i>h</i> <sup>-</sup> <i>ade6-M210/ade6-M216 his3-D1/his3-D1 trt1</i> <sup>+</sup> / <i>trt1Δ</i> :: <i>his3</i> <sup>+</sup><br><i>ccq1</i> <sup>+</sup> / <i>ccq1Δ</i> ::hphMX   |
|          | JH12263        | <i>trt1</i> <sup>+</sup> / <i>trt1Δ tpz1</i> <sup>+</sup> / <i>tpz1-L449R</i> | <i>h</i> <sup>+</sup> / <i>h</i> <sup>-</sup> <i>ade6-M210/ade6-M216 his3-D1/his3-D1 trt1</i> <sup>+</sup> / <i>trt1Δ</i> :: <i>his3</i> <sup>+</sup> <i>tpz1</i> <sup>+</sup> / <i>tpz1-L449R</i> ::hphMX |
| S6A      | CF199          | <i>wt</i>                                                                     | <i>h</i> <sup>-</sup> <i>ade6-M210 his3-D1</i>                                                                                                                                                             |
|          | TN6584         | <i>ccq1Δ</i>                                                                  | <i>h</i> <sup>-</sup> <i>ade6-M210 his3-D1 ccq1Δ</i> ::hphMX                                                                                                                                               |
|          | JH11578        | <i>tpz1-L449R</i>                                                             | <i>h</i> <sup>-</sup> <i>ade6-M216 his3-D1 tpz1-L449R</i> ::hphMX                                                                                                                                          |
|          | JH11423        | <i>tpz1-Y439R,L445R</i>                                                       | <i>h</i> <sup>-</sup> <i>ade6-M210 his3-D1 tpz1-Y439R,L445R</i> ::hphMX                                                                                                                                    |
|          | JH11574        | <i>tpz1-Y439R,L445R,L449R</i>                                                 | <i>h</i> <sup>-</sup> <i>ade6-M210 his3-D1 tpz1-Y439R,L445R,L449R</i> ::hphMX                                                                                                                              |
| S6B      | 1,2 JH11722    | <i>chk1-myc</i>                                                               | <i>h</i> <sup>-</sup> <i>ade6-M216 his3-D1 chk1</i> <sup>+</sup> ::9myc-2HA-6his-ura4 <sup>+</sup> <i>tpz1</i> <sup>+</sup> ::hphMX                                                                        |
|          | 3 JH11724      | <i>chk1-myc ccq1Δ</i>                                                         | <i>h</i> <sup>+</sup> <i>his3-D1 chk1</i> <sup>+</sup> ::9myc-2HA-6his-ura4 <sup>+</sup> <i>tpz1</i> <sup>+</sup> ::hphMX <i>ccq1Δ</i> ::hphMX                                                             |
|          | 4 JH11636      | <i>chk1-myc tpz1-L449R</i>                                                    | <i>h</i> <sup>-</sup> <i>ade6-M216 his3-D1 chk1</i> <sup>+</sup> ::9myc-2HA-6his-ura4 <sup>+</sup> <i>tpz1-L449R</i> ::hphMX                                                                               |
|          | 5 JH11638      | <i>chk1-myc tpz1-Y439R,L445R</i>                                              | <i>h</i> <sup>-</sup> <i>ade6-M216 his3-D1 chk1</i> <sup>+</sup> ::9myc-2HA-6his-ura4 <sup>+</sup> <i>tpz1-Y439R,L445R</i> ::hphMX                                                                         |
|          | 6 JH11640      | <i>chk1-myc tpz1-Y439R,L445R,L449R</i>                                        | <i>h</i> <sup>+</sup> <i>ade6-M216 his3-D1 chk1</i> <sup>+</sup> ::9myc-2HA-6his-ura4 <sup>+</sup> <i>tpz1-Y439R,L445R,L449R</i> ::hphMX                                                                   |
|          | S7A            | 1 TN2411                                                                      | <i>his</i> <sup>-</sup>                                                                                                                                                                                    |
| 2 TN3784 |                | <i>his</i> <sup>+</sup>                                                       | <i>h</i> <sup>-</sup>                                                                                                                                                                                      |
| 3 CF52   |                | <i>telomere (1L)::his3</i> <sup>+</sup>                                       | <i>h</i> <sup>90</sup> <i>ura4-DS/E ade6-M210 his3-D1 his3</i> <sup>+</sup> :: <i>tel(1L)</i>                                                                                                              |
| 4 TN9133 |                | <i>telomere (1L)::his3</i> <sup>+</sup> <i>ccq1Δ</i>                          | <i>h</i> <sup>-</sup> <i>his3-D1 ccq1Δ</i> ::hphMX <i>his3</i> <sup>+</sup> :: <i>tel(1L)</i>                                                                                                              |
| 5 TN9630 |                | <i>telomere (1L)::his3</i> <sup>+</sup> <i>tpz1-L449R</i>                     | <i>h</i> <sup>+</sup> <i>ade6-M216 his3-D1 tpz1-L449R</i> ::13myc-kanMX6 <i>his3</i> <sup>+</sup> :: <i>tel(1L)</i>                                                                                        |
| 6 TN9623 |                | <i>telomere (1L)::his3</i> <sup>+</sup> <i>tpz1-Y439R,L445R</i>               | <i>h</i> <sup>-</sup> <i>ade6-M210 his3-D1 tpz1-Y439R,L445R</i> ::13myc-kanMX6 <i>his3</i> <sup>+</sup> :: <i>tel(1L)</i>                                                                                  |
| S7B      | 1 TN2411       | <i>his</i> <sup>-</sup>                                                       | <i>h</i> <sup>-</sup> <i>his3-D1</i>                                                                                                                                                                       |
|          | 2 TN3784       | <i>his</i> <sup>+</sup>                                                       | <i>h</i> <sup>-</sup>                                                                                                                                                                                      |
|          | 3 CF52         | <i>telomere (1L)::his3</i> <sup>+</sup>                                       | <i>h</i> <sup>90</sup> <i>ura4-DS/E ade6-M210 his3-D1 his3</i> <sup>+</sup> :: <i>tel(1L)</i>                                                                                                              |
|          | 4 TN9607       | <i>telomere (1L)::his3</i> <sup>+</sup> <i>poz1Δ</i>                          | <i>h</i> <sup>+</sup> <i>ade6-M210 his3-D1 poz1Δ</i> ::natMX6 <i>his3</i> <sup>+</sup> :: <i>tel(1L)</i>                                                                                                   |
|          | 5 TN9614       | <i>telomere (1L)::his3</i> <sup>+</sup> <i>tpz1-W498R,I501R</i>               | <i>h</i> <sup>+</sup> <i>ade6-M210 his3-D1 tpz1-W498R,I501R</i> ::13myc-kanMX6 <i>his3</i> <sup>+</sup> :: <i>tel(1L)</i>                                                                                  |
|          | 6 TN9618       | <i>telomere (1L)::his3</i> <sup>+</sup> <i>tpz1-[1-485]</i>                   | <i>h</i> <sup>+</sup> <i>ade6-M210 his3-D1 tpz1-[1-485]</i> ::13myc-kanMX6 <i>his3</i> <sup>+</sup> :: <i>tel(1L)</i>                                                                                      |
| S8A      | 1 TN6770       | <i>ccq1-FLAG</i>                                                              | <i>h</i> <sup>+</sup> <i>his3-D1 ccq1</i> <sup>+</sup> ::5FLAG-kanMX6                                                                                                                                      |
|          | 2 TN10988      | <i>trt1Δ ccq1-FLAG</i>                                                        | <i>h</i> <sup>-</sup> <i>ade6-M210 his3-D1 trt1Δ</i> :: <i>his3</i> <sup>+</sup> <i>ccq1</i> <sup>+</sup> ::5FLAG-kanMX6                                                                                   |
|          | 3 TN10991      | <i>trt1Δ ccq1-T93A-FLAG</i>                                                   | <i>h</i> <sup>-</sup> <i>ade6-M210 his3-D1 trt1Δ</i> :: <i>his3</i> <sup>+</sup> <i>ccq1-T93A</i> ::5FLAG-kanMX6                                                                                           |
|          | 4 JH11174      | <i>ccq1-FLAG tpz1-L449R-myc</i>                                               | <i>h</i> <sup>-</sup> <i>ccq1</i> <sup>+</sup> ::5FLAG-kanMX6 <i>tpz1-L449R</i> ::13myc-kanMX6                                                                                                             |
|          | 5 JH11238      | <i>ccq1-FLAG tpz1-Y439R,L445R-myc</i>                                         | <i>h</i> <sup>-</sup> <i>his3-D1 ccq1</i> <sup>+</sup> ::5FLAG-kanMX6 <i>tpz1-Y439R,L445R</i> ::13myc-kanMX6                                                                                               |
|          | 6 JH11248      | <i>ccq1-FLAG tpz1-Y439R,L445R,L449R-myc</i>                                   | <i>h</i> <sup>+</sup> <i>his3-D1 ccq1</i> <sup>+</sup> ::5FLAG-kanMX6 <i>tpz1-Y439R,L445R,L449R</i> -13myc-kanMX6                                                                                          |
| S8B      | 1 JH11289      | <i>ccq1</i> <sup>+</sup> (no tag)                                             | <i>h</i> <sup>-</sup> <i>his3-D1 tpz1</i> <sup>+</sup> ::hphMX                                                                                                                                             |
|          | 2 JH11569      | <i>ccq1-myc</i>                                                               | <i>h</i> <sup>+</sup> <i>his3-D1 ccq1</i> <sup>+</sup> ::13myc-kanMX6 <i>tpz1</i> <sup>+</sup> ::hphMX                                                                                                     |
|          | 3 JH11622      | <i>ccq1-myc tpz1-L449R</i>                                                    | <i>h</i> <sup>+</sup> <i>his3-D1 ccq1</i> <sup>+</sup> ::13myc-kanMX6 <i>tpz1-L449R</i> ::hphMX                                                                                                            |
|          | 4 JH11452      | <i>ccq1-myc tpz1-Y439R,L445R</i>                                              | <i>h</i> <sup>+</sup> <i>his3-D1 ccq1</i> <sup>+</sup> ::13myc-kanMX6 <i>tpz1-Y439R,L445R</i> ::hphMX                                                                                                      |
|          | 5 JH11609      | <i>ccq1-myc tpz1-Y439R,L445R,L449R</i>                                        | <i>h</i> <sup>+</sup> <i>his3-D1 ccq1</i> <sup>+</sup> ::13myc-kanMX6 <i>tpz1-Y439R,L445R,L449R</i> ::hphMX                                                                                                |

**Characterization of fission yeast shelterin**  
Harland *et al.*

| Figure | Strain     | Full Genotype <sup>a</sup>             |                                                                                                                                                     |
|--------|------------|----------------------------------------|-----------------------------------------------------------------------------------------------------------------------------------------------------|
| S8C    | 1 JH11289  | <i>trt1</i> <sup>+</sup> (no tag)      | <i>h</i> <sup>-</sup> <i>his3-D1 tpz1</i> <sup>+</sup> :: <i>hphMX</i>                                                                              |
|        | 2 JH11630  | <i>trt1-myc</i>                        | <i>h</i> <sup>-</sup> <i>ade6-M216 his3-D1 trt1</i> <sup>+</sup> :: <i>G<sub>8</sub>-13myc-kanMX6 tpz1</i> <sup>+</sup> :: <i>hphMX</i>             |
|        | 3 JH11626  | <i>trt1-myc tpz1-L449R</i>             | <i>h</i> <sup>-</sup> <i>ade6-M216 his3-D1 trt1</i> <sup>+</sup> :: <i>G<sub>8</sub>-13myc-kanMX6 tpz1-L449R</i> :: <i>hphMX</i>                    |
|        | 4 JH11449  | <i>trt1-myc tpz1-Y439R,L445R</i>       | <i>h</i> <sup>+</sup> <i>ade6-M210 his3-D1 trt1</i> <sup>+</sup> :: <i>G<sub>8</sub>-13myc-kanMX6 tpz1-Y439R,L445R</i> :: <i>hphMX</i>              |
|        | 5 JH11611  | <i>trt1-myc tpz1-Y439R,L445R,L449R</i> | <i>h</i> <sup>-</sup> <i>ade6-M210 his3-D1 trt1</i> <sup>+</sup> :: <i>G<sub>8</sub>-13myc-kanMX6 tpz1-Y439R,L445R,L449R</i> :: <i>hphMX</i>        |
|        | 6 JH11644  | <i>trt1-myc ccq1Δ</i>                  | <i>h</i> <sup>+</sup> <i>his3-D1 trt1</i> <sup>+</sup> :: <i>G<sub>8</sub>-13myc-kanMX6 tpz1</i> <sup>+</sup> :: <i>hphMX ccq1Δ</i> :: <i>hphMX</i> |
| S8D    | 1 TN2411   | <i>tpz1</i> <sup>+</sup>               | <i>h</i> <sup>-</sup> <i>his3-D1</i>                                                                                                                |
|        | 2 TN7196   | <i>tpz1-myc</i>                        | <i>h</i> <sup>-</sup> <i>his3-D1 tpz1</i> <sup>+</sup> :: <i>13myc-kanMX6</i>                                                                       |
|        | 3 TN9009   | <i>tpz1-myc ccq1Δ</i>                  | <i>h</i> <sup>+</sup> <i>his3-D1 tpz1-13myc:KanMX6 ccq1Δ</i> :: <i>hphMX</i>                                                                        |
|        | 4 JH11181  | <i>tpz1-L449R-myc</i>                  | <i>h</i> <sup>-</sup> <i>ade6-M216 tpz1-L449R</i> :: <i>13myc-kanMX6</i>                                                                            |
|        | 5 JH11218  | <i>tpz1-Y439R,L445R-myc</i>            | <i>h</i> <sup>+</sup> <i>ade6-M210 his3-D1 tpz1-Y439R,L445R</i> :: <i>13myc-kanMX6</i>                                                              |
|        | 6 JH11232  | <i>tpz1-Y439R,L445R,L449R-myc</i>      | <i>h</i> <sup>+</sup> <i>ade6-M210 his3-D1 tpz1-Y439R,L445R,L449R</i> :: <i>13myc-kanMX6</i>                                                        |
| S9A    | 1 JH11289  | <i>ccq1</i> <sup>+</sup> (no tag)      | <i>h</i> <sup>-</sup> <i>his3-D1 tpz1</i> <sup>+</sup> :: <i>hphMX</i>                                                                              |
|        | 2 JH11569  | <i>ccq1-myc</i>                        | <i>h</i> <sup>+</sup> <i>his3-D1 ccq1</i> <sup>+</sup> :: <i>13myc-kanMX6 tpz1</i> <sup>+</sup> :: <i>hphMX</i>                                     |
|        | 3 TN14558  | <i>ccq1-myc tpz1-L449A</i>             | <i>h</i> <sup>-</sup> <i>his3-D1 ccq1</i> <sup>+</sup> :: <i>13myc-kanMX6 tpz1-L449A</i> :: <i>hphMX</i>                                            |
|        | 4 JH11622  | <i>ccq1-myc tpz1-L449R</i>             | <i>h</i> <sup>+</sup> <i>his3-D1 ccq1</i> <sup>+</sup> :: <i>13myc-kanMX6 tpz1-L449R</i> :: <i>hphMX</i>                                            |
| S9B    | 1 JH11289  | <i>trt1</i> <sup>+</sup> (no tag)      | <i>h</i> <sup>-</sup> <i>his3-D1 tpz1</i> <sup>+</sup> :: <i>hphMX</i>                                                                              |
|        | 2 JH11630  | <i>trt1-myc</i>                        | <i>h</i> <sup>-</sup> <i>ade6-M216 his3-D1 trt1</i> <sup>+</sup> :: <i>G<sub>8</sub>-13myc-kanMX6 tpz1</i> <sup>+</sup> :: <i>hphMX</i>             |
|        | 3 JH11644  | <i>trt1-myc ccq1Δ</i>                  | <i>h</i> <sup>+</sup> <i>his3-D1 trt1</i> <sup>+</sup> :: <i>G<sub>8</sub>-13myc-kanMX6 tpz1</i> <sup>+</sup> :: <i>hphMX ccq1Δ</i> :: <i>hphMX</i> |
|        | 4 TN14545  | <i>trt1-myc tpz1-L449A</i>             | <i>h</i> <sup>-</sup> <i>his3-D1 trt1</i> <sup>+</sup> :: <i>G<sub>8</sub>-13myc-kanMX6 tpz1-L449A</i> :: <i>hphMX</i>                              |
|        | 5 JH11626  | <i>trt1-myc tpz1-L449R</i>             | <i>h</i> <sup>-</sup> <i>ade6-M216 his3-D1 trt1</i> <sup>+</sup> :: <i>G<sub>8</sub>-13myc-kanMX6 tpz1-L449R</i> :: <i>hphMX</i>                    |
|        | 6 YTC12756 | <i>trt1-D743A-myc</i>                  | <i>h</i> <sup>-</sup> <i>ade6-M210 his3-D1 trt1-D743A</i> :: <i>G<sub>8</sub>-13myc-kanMX6</i>                                                      |
| S10B   | 1 TN2411   | <i>tpz1</i> <sup>+</sup> (no tag)      | <i>h</i> <sup>-</sup> <i>his3-D1</i>                                                                                                                |
|        | 2 TN7196   | <i>tpz1-myc</i>                        | <i>h</i> <sup>-</sup> <i>his3-D1 tpz1</i> <sup>+</sup> :: <i>13myc-kanMX6</i>                                                                       |
|        | 3 JH10915  | <i>tpz1-[1-379]-myc</i>                | <i>h</i> <sup>-</sup> <i>ade6-M216 tpz1-[1-379]</i> :: <i>13myc-kanMX6</i>                                                                          |
|        | 4 JH10919  | <i>tpz1-[1-420]-myc</i>                | <i>h</i> <sup>-</sup> <i>ade6-M216 his3-D1 tpz1-[1-420]</i> :: <i>13myc-kanMX6</i>                                                                  |
|        | 5 JH11215  | <i>tpz1-[Δ421-485]-myc</i>             | <i>h</i> <sup>+</sup> <i>ade6-M216 his3-D1 tpz1-[Δ421-485]</i> :: <i>13myc-kanMX6</i>                                                               |
|        | 6 JH10922  | <i>tpz1-[1-485]-myc</i>                | <i>h</i> <sup>-</sup> <i>ade6-M210 his3-D1 tpz1-[1-485]</i> :: <i>13myc-kanMX6</i>                                                                  |
| S10C   | 1,7 TN2411 | <i>tpz1</i> <sup>+</sup> (no tag)      | <i>h</i> <sup>-</sup> <i>his3-D1</i>                                                                                                                |
|        | 2 TN7196   | <i>tpz1-myc</i>                        | <i>h</i> <sup>-</sup> <i>his3-D1 tpz1</i> <sup>+</sup> :: <i>13myc-kanMX6</i>                                                                       |
|        | 3 JH10915  | <i>tpz1-[1-379]-myc</i>                | <i>h</i> <sup>-</sup> <i>ade6-M216 tpz1-[1-379]</i> :: <i>13myc-kanMX6</i>                                                                          |
|        | 4 JH10919  | <i>tpz1-[1-420]-myc</i>                | <i>h</i> <sup>-</sup> <i>ade6-M216 his3-D1 tpz1-[1-420]</i> :: <i>13myc-kanMX6</i>                                                                  |
|        | 5 JH11215  | <i>tpz1-[Δ421-485]-myc</i>             | <i>h</i> <sup>+</sup> <i>ade6-M216 his3-D1 tpz1-[Δ421-485]</i> :: <i>13myc-kanMX6</i>                                                               |
|        | 6 JH10922  | <i>tpz1-[1-485]-myc</i>                | <i>h</i> <sup>-</sup> <i>ade6-M210 his3-D1 tpz1-[1-485]</i> :: <i>13myc-kanMX6</i>                                                                  |
| S10D   | 1 TN7196   | <i>tpz1-myc</i>                        | <i>h</i> <sup>-</sup> <i>his3-D1 tpz1</i> <sup>+</sup> :: <i>13myc-kanMX6</i>                                                                       |
|        | 2 JH10915  | <i>tpz1-[1-379]-myc</i>                | <i>h</i> <sup>-</sup> <i>ade6-M216 tpz1-[1-379]</i> :: <i>13myc-kanMX6</i>                                                                          |
|        | 3 JH10919  | <i>tpz1-[1-420]-myc</i>                | <i>h</i> <sup>-</sup> <i>ade6-M216 his3-D1 tpz1-[1-420]</i> :: <i>13myc-kanMX6</i>                                                                  |
|        | 4 JH11215  | <i>tpz1-[Δ421-485]-myc</i>             | <i>h</i> <sup>+</sup> <i>ade6-M216 his3-D1 tpz1-[Δ421-485]</i> :: <i>13myc-kanMX6</i>                                                               |
|        | 5 JH10922  | <i>tpz1-[1-485]-myc</i>                | <i>h</i> <sup>-</sup> <i>ade6-M210 his3-D1 tpz1-[1-485]</i> :: <i>13myc-kanMX6</i>                                                                  |
| S11B   | TN7196     | <i>tpz1-myc</i>                        | <i>h</i> <sup>-</sup> <i>his3-D1 tpz1</i> <sup>+</sup> :: <i>13myc-kanMX6</i>                                                                       |
|        | JH12981    | <i>tpz1-myc pot1Δ</i>                  | <i>h</i> <sup>-</sup> <i>ade6-M216 his3-D1 tpz1</i> <sup>+</sup> :: <i>13myc-kanMX6 pot1Δ</i> :: <i>natMX</i>                                       |
| S11C   | 1 TN7196   | <i>tpz1-myc</i>                        | <i>h</i> <sup>-</sup> <i>his3-D1 tpz1</i> <sup>+</sup> :: <i>13myc-kanMX6</i>                                                                       |
|        | 2 YTC9366  | <i>tpz1-myc poz1Δ</i>                  | <i>h</i> <sup>-</sup> <i>his3-D1 tpz1</i> <sup>+</sup> :: <i>13myc-kanMX6 poz1Δ</i> :: <i>natMX6</i>                                                |
|        | 3 TN9009   | <i>tpz1-myc ccq1Δ</i>                  | <i>h</i> <sup>+</sup> <i>his3-D1 tpz1-13myc:KanMX6 ccq1Δ</i> :: <i>hphMX</i>                                                                        |
|        | 4 JH11701  | <i>tpz1-myc poz1Δ ccq1Δ</i>            | <i>h</i> <sup>+</sup> <i>his3-D1 tpz1</i> <sup>+</sup> :: <i>13myc-kanMX6 poz1Δ</i> :: <i>natMX6 ccq1Δ</i> :: <i>hphMX</i>                          |
|        | 5 JH11835  | <i>tpz1-L449R-myc</i>                  | <i>h</i> <sup>+</sup> <i>ade6-M210 his3-D1 tpz1-L449R</i> :: <i>13myc-kanMX6</i>                                                                    |
|        | 6 JH11190  | <i>tpz1-W498R,I501R-myc</i>            | <i>h</i> <sup>+</sup> <i>leu1-32 ura4-D18 ade6-M216 his3-D1 tpz1-W498R,I501R</i> :: <i>13myc-kanMX6</i>                                             |
|        | 7 JH11781  | <i>tpz1-L449R,W498R,I501R-myc</i>      | <i>h</i> <sup>+</sup> <i>ade6-M216 his3-D1 tpz1-L449R,W498R,I501R</i> :: <i>13myc-kanMX6</i>                                                        |
|        | 8 JH10922  | <i>tpz1-[1-485]-myc</i>                | <i>h</i> <sup>-</sup> <i>ade6-M210 his3-D1 tpz1-[1-485]</i> :: <i>13myc-kanMX6</i>                                                                  |
|        | 9 JH11790  | <i>tpz1-[1-485]-L449R-myc</i>          | <i>h</i> <sup>-</sup> <i>ade6-M216 his3-D1 tpz1-[1-485]-L449R</i> :: <i>13myc-kanMX6</i>                                                            |

**Characterization of fission yeast shelterin**  
Harland *et al.*

| Figure | Strain     | Full Genotype <sup>a</sup>                                                                                                                                   |
|--------|------------|--------------------------------------------------------------------------------------------------------------------------------------------------------------|
| S11D   | 1 YTC9716  | <i>pot1-FLAG</i> <i>h<sup>+</sup> his3-D1 pot1<sup>+</sup>::3FLAG-kanMX</i>                                                                                  |
|        | 2 JH11046  | <i>pot1-FLAG tpz1-myc</i> <i>h<sup>-</sup> his3-D1 pot1<sup>+</sup>::3FLAG-kanMX tpz1<sup>+</sup>::13myc-kanMX6</i>                                          |
|        | 3 JH12971  | <i>pot1-FLAG tpz1-myc ccq1Δ</i> <i>h<sup>-</sup> his3-D1 pot1<sup>+</sup>::3FLAG-kanMX tpz1<sup>+</sup>::13myc-kanMX6 ccq1Δ::hphMX</i>                       |
|        | 4 JH12975  | <i>pot1-FLAG tpz1-myc poz1Δ</i> <i>h<sup>+</sup> his3-D1 pot1<sup>+</sup>::3FLAG-kanMX tpz1<sup>+</sup>::13myc-kanMX6 poz1Δ::natMX6</i>                      |
|        | 5 JH12977  | <i>pot1-FLAG tpz1-myc poz1Δ ccq1Δ</i> <i>h<sup>+</sup> his3-D1 pot1<sup>+</sup>::3FLAG-kanMX tpz1<sup>+</sup>::13myc-kanMX6 poz1Δ::natMX6 ccq1Δ::hphMX</i>   |
| S12A   | 1 TN2411   | <i>tpz1<sup>+</sup></i> <i>h<sup>-</sup> his3-D1</i>                                                                                                         |
|        | 2 YTC8354  | <i>poz1Δ</i> <i>h<sup>-</sup> ade6-M216 his3-D1 poz1Δ::natMX6</i>                                                                                            |
|        | 3 TN5345   | <i>rap1Δ</i> <i>h<sup>+</sup> his3-D1 rap1Δ::ura4<sup>+</sup></i>                                                                                            |
|        | 4 TN7196   | <i>tpz1-myc</i> <i>h<sup>-</sup> his3-D1 tpz1<sup>+</sup>::13myc-kanMX6</i>                                                                                  |
|        | 5 YTC9366  | <i>tpz1-myc poz1Δ</i> <i>h<sup>-</sup> his3-D1 tpz1<sup>+</sup>::13myc-kanMX6 poz1Δ::natMX6</i>                                                              |
|        | 6 YTC9310  | <i>tpz1-myc rap1Δ</i> <i>h<sup>-</sup> his3-D1 tpz1<sup>+</sup>::13myc-kanMX6 rap1Δ::ura4<sup>+</sup></i>                                                    |
|        | 7 JH12951  | <i>tpz1-myc poz1Δ rap1Δ</i> <i>h<sup>-</sup> his3-D1 tpz1<sup>+</sup>::13myc-kanMX6 poz1Δ::natMX6 rap1Δ::ura4<sup>+</sup></i>                                |
|        | 8 JH11191  | <i>tpz1-W498R,I501R-myc</i> <i>h<sup>+</sup> ade6-M216 his3-D1 tpz1-W498R,I501R::13myc-kanMX6</i>                                                            |
|        | 9 JH11692  | <i>tpz1-W498R,I501R-myc poz1Δ</i> <i>h<sup>-</sup> ade6-M216 his3-D1 tpz1-W498R,I501R::13myc-kanMX6 poz1Δ::natMX6</i>                                        |
|        | 10 JH12052 | <i>tpz1-W498R,I501R-myc rap1Δ</i> <i>h<sup>+</sup> ade6-M216 his3-D1 tpz1-W498R,I501R::13myc-kanMX6 rap1Δ::ura4<sup>+</sup></i>                              |
|        | 11 JH12955 | <i>tpz1-W498R,I501R-myc poz1Δ rap1Δ</i> <i>h<sup>-</sup> his3-D1 tpz1-W498R,I501R::13myc-kanMX6 poz1Δ::natMX6 rap1Δ::ura4<sup>+</sup></i>                    |
| S12B   | 1 TN2411   | <i>tpz1<sup>+</sup></i> <i>h<sup>-</sup> his3-D1</i>                                                                                                         |
|        | 2 JH12908  | <i>tpz1-W498R,I501R</i> <i>h<sup>-</sup> ade6-M210 his3-D1 tpz1-W498R,I501R::hphMX</i>                                                                       |
|        | 3 TN7217   | <i>ccq1-myc</i> <i>h<sup>-</sup> his3-D1 ccq1<sup>+</sup>::13myc-kanMX6</i>                                                                                  |
|        | 4 YTC8712  | <i>ccq1-myc poz1Δ</i> <i>h<sup>+</sup> his3-D1 ccq1<sup>+</sup>::13myc-kanMX6 poz1Δ::natMX6</i>                                                              |
|        | 5 JH12894  | <i>ccq1-myc tpz1-W498R,I501R</i> <i>h<sup>-</sup> his3-D1 ccq1<sup>+</sup>::13myc-kanMX6 tpz1-W498R,I501R::hphMX</i>                                         |
|        | 6 JH12897  | <i>ccq1-myc tpz1-W498R,I501R poz1Δ</i> <i>h<sup>-</sup> his3-D1 ccq1<sup>+</sup>::13myc-kanMX6 tpz1-W498R,I501R::hphMX poz1Δ::natMX6</i>                     |
| S12C   | 1 TN11289  | <i>tpz1<sup>+</sup></i> <i>h<sup>-</sup> his3-D1 tpz1<sup>+</sup>::hphMX</i>                                                                                 |
|        | 2 JH12908  | <i>tpz1-W498R,I501R</i> <i>h<sup>-</sup> ade6-M210 his3-D1 tpz1-W498R,I501R::hphMX</i>                                                                       |
|        | 3 JH12265  | <i>poz1-myc</i> <i>h<sup>+</sup> his3-D1 poz1<sup>+</sup>::13myc-kanMX6 tpz1<sup>+</sup>::hphMX</i>                                                          |
|        | 4 JH12267  | <i>poz1-myc rap1Δ</i> <i>h<sup>+</sup> his3-D1 poz1<sup>+</sup>::13myc-kanMX6 tpz1<sup>+</sup>::hphMX rap1Δ::ura4<sup>+</sup></i>                            |
|        | 5 JH12659  | <i>poz1-myc tpz1-W498R,I501R</i> <i>h<sup>+</sup> ade6-M210 his3-D1 poz1<sup>+</sup>::13myc-kanMX6 tpz1-W498R,I501R::hphMX</i>                               |
|        | 6 JH12056  | <i>poz1-myc tpz1-W498R,I501R rap1Δ</i> <i>h<sup>+</sup> ade6-M210 his3-D1 poz1<sup>+</sup>::13myc-kanMX6 tpz1-W498R,I501R::hphMX rap1Δ::ura4<sup>+</sup></i> |
| S12D   | 1 TN11289  | <i>tpz1<sup>+</sup></i> <i>h<sup>-</sup> his3-D1 tpz1<sup>+</sup>::hphMX</i>                                                                                 |
|        | 2 JH12908  | <i>tpz1-W498R,I501R</i> <i>h<sup>-</sup> ade6-M210 his3-D1 tpz1-W498R,I501R::hphMX</i>                                                                       |
|        | 3 JH11630  | <i>trt1-myc</i> <i>h<sup>-</sup> ade6-M216 his3-D1 trt1<sup>+</sup>::G<sub>8</sub>-13myc-kanMX6 tpz1<sup>+</sup>::hphMX</i>                                  |
|        | 4 JH12770  | <i>trt1-myc poz1Δ</i> <i>h<sup>-</sup> ade6-M216 his3-D1 trt1<sup>+</sup>::G<sub>8</sub>-13myc-kanMX6 tpz1<sup>+</sup>::hphMX poz1Δ::natMX6</i>              |
|        | 5 JH12766  | <i>trt1-myc tpz1-W498R,I501R</i> <i>h<sup>-</sup> his3-D1 trt1<sup>+</sup>::G<sub>8</sub>-13myc-kanMX6 tpz1-W498R,I501R::hphMX</i>                           |
| S13A   | 1 TN2411   | <i>tpz1<sup>+</sup></i> <i>h<sup>-</sup> his3-D1</i>                                                                                                         |
|        | 2 YTC8354  | <i>poz1Δ</i> <i>h<sup>-</sup> ade6-M216 his3-D1 poz1Δ::natMX6</i>                                                                                            |
|        | 3 TN7196   | <i>tpz1-myc</i> <i>h<sup>-</sup> his3-D1 tpz1<sup>+</sup>::13myc-kanMX6</i>                                                                                  |
|        | 4 YTC9366  | <i>tpz1-myc poz1Δ</i> <i>h<sup>-</sup> his3-D1 tpz1<sup>+</sup>::13myc-kanMX6 poz1Δ::natMX6</i>                                                              |
|        | 5 JH11191  | <i>tpz1-W498R,I501R-myc</i> <i>h<sup>+</sup> ade6-M216 his3-D1 tpz1-W498R,I501R::13myc-kanMX6</i>                                                            |
|        | 6 JH11692  | <i>tpz1-W498R,I501R-myc poz1Δ</i> <i>h<sup>-</sup> ade6-M216 his3-D1 tpz1-W498R,I501R::13myc-kanMX6 poz1Δ::natMX6</i>                                        |
| S13B   | 1 TN2411   | <i>tpz1<sup>+</sup></i> <i>h<sup>-</sup> his3-D1</i>                                                                                                         |
|        | 2 JH12908  | <i>tpz1-W498R,I501R</i> <i>h<sup>-</sup> ade6-M210 his3-D1 tpz1-W498R,I501R::hphMX</i>                                                                       |
|        | 3 TN7217   | <i>ccq1-myc</i> <i>h<sup>-</sup> his3-D1 ccq1<sup>+</sup>::13myc-kanMX6</i>                                                                                  |
|        | 4 YTC8712  | <i>ccq1-myc poz1Δ</i> <i>h<sup>+</sup> his3-D1 ccq1<sup>+</sup>::13myc-kanMX6 poz1Δ::natMX6</i>                                                              |
|        | 5 JH12895  | <i>ccq1-myc tpz1-W498R,I501R</i> <i>h<sup>+</sup> his3-D1 ccq1<sup>+</sup>::13myc-kanMX6 tpz1-W498R,I501R::hphMX</i>                                         |
|        | 6 JH12897  | <i>ccq1-myc tpz1-W498R,I501R poz1Δ</i> <i>h<sup>-</sup> his3-D1 ccq1<sup>+</sup>::13myc-kanMX6 tpz1-W498R,I501R::hphMX poz1Δ::natMX6</i>                     |

**Characterization of fission yeast shelterin**  
Harland *et al.*

| Figure | Strain                                           | Full Genotype <sup>a</sup>                                                                                                                            |
|--------|--------------------------------------------------|-------------------------------------------------------------------------------------------------------------------------------------------------------|
| S13C   | 1 TN11289 <i>tpz1</i> <sup>+</sup>               | <i>h</i> <sup>-</sup> <i>his3-D1 tpz1</i> <sup>+</sup> :: <i>hphMX</i>                                                                                |
|        | 2 JH12908 <i>tpz1-W498R,I501R</i>                | <i>h</i> <sup>-</sup> <i>ade6-M210 his3-D1 tpz1-W498R,I501R</i> :: <i>hphMX</i>                                                                       |
|        | 3 JH12265 <i>poz1-myc</i>                        | <i>h</i> <sup>+</sup> <i>his3-D1 poz1</i> <sup>+</sup> :: <i>13myc-kanMX6 tpz1</i> <sup>+</sup> :: <i>hphMX</i>                                       |
|        | 4 JH12267 <i>poz1-myc rap1Δ</i>                  | <i>h</i> <sup>+</sup> <i>his3-D1 poz1</i> <sup>+</sup> :: <i>13myc-kanMX6 tpz1</i> <sup>+</sup> :: <i>hphMX rap1Δ::ura4</i> <sup>+</sup>              |
|        | 5 JH12659 <i>poz1-myc tpz1-W498R,I501R</i>       | <i>h</i> <sup>+</sup> <i>ade6-M210 his3-D1 poz1</i> <sup>+</sup> :: <i>13myc-kanMX6 tpz1-W498R,I501R</i> :: <i>hphMX</i>                              |
|        | 6 JH12056 <i>poz1-myc tpz1-W498R,I501R rap1Δ</i> | <i>h</i> <sup>+</sup> <i>ade6-M210 his3-D1 poz1</i> <sup>+</sup> :: <i>13myc-kanMX6 tpz1-W498R,I501R</i> :: <i>hphMX rap1Δ::ura4</i> <sup>+</sup>     |
| S13D   | 1 TN11289 <i>tpz1</i> <sup>+</sup>               | <i>h</i> <sup>-</sup> <i>his3-D1 tpz1</i> <sup>+</sup> :: <i>hphMX</i>                                                                                |
|        | 2 JH12908 <i>tpz1-W498R,I501R</i>                | <i>h</i> <sup>-</sup> <i>ade6-M210 his3-D1 tpz1-W498R,I501R</i> :: <i>hphMX</i>                                                                       |
|        | 3 JH11630 <i>trt1-myc</i>                        | <i>h</i> <sup>-</sup> <i>ade6-M216 his3-D1 trt1</i> <sup>+</sup> :: <i>G<sub>8</sub>-13myc-kanMX6 tpz1</i> <sup>+</sup> :: <i>hphMX</i>               |
|        | 4 JH12770 <i>trt1-myc poz1Δ</i>                  | <i>h</i> <sup>-</sup> <i>ade6-M216 his3-D1 trt1</i> <sup>+</sup> :: <i>G<sub>8</sub>-13myc-kanMX6 tpz1</i> <sup>+</sup> :: <i>hphMX poz1Δ::natMX6</i> |
|        | 5 JH12766 <i>trt1-myc tpz1-W498R,I501R</i>       | <i>h</i> <sup>-</sup> <i>his3-D1 trt1</i> <sup>+</sup> :: <i>G<sub>8</sub>-13myc-kanMX6 tpz1-W498R,I501R</i> :: <i>hphMX</i>                          |

<sup>a</sup>All strains are *leu1-32 ura4-D18* (haploid) or *leu1-32/leu1-32 ura4-D18/ura4-D18* (diploid)
