# Supplementary material for: Tpz1-Ccq1 and Tpz1-Poz1 Interactions within Fission Yeast Shelterin Modulate Ccq1 Thr93 Phosphorylation and Telomerase Recruitment
Source: PubMed Central journal article supplement (PMC4199508; doi:10.1371/journal.pgen.1004708), 2014-10-16
Supplement: pgen.1004708.s016.pdf [file pgen.1004708.s016.pdf]

**Table S3** Plasmids used to integrate *tpz1* mutant alleles into fission yeast.

| Plasmid (Lab stock #)                         | Mutant alleles                              |
|-----------------------------------------------|---------------------------------------------|
| pBS-tpz1-13myc-kanMX (607)                    | <i>tpz1-myc</i>                             |
| pBS-tpz1-L449R-13myc-kanMX (697)              | <i>tpz1-L449R-myc</i>                       |
| pBS-tpz1-L449A-13myc-kanMX (836)              | <i>tpz1-L449A-myc</i>                       |
| pBS-tpz1-Y439R,L445R-13myc-kanMX (716)        | <i>tpz1-Y439R,L445R-myc</i>                 |
| pBS-tpz1-Y439R,L445R,L449R-13myc-kanMX (718)  | <i>tpz1-Y439R,L445R,L449R-myc</i>           |
| pBS-tpz1(1-485)-13myc-kanMX (654)             | <i>tpz1-[1-485]-myc</i>                     |
| pBS-tpz1-W498R,I501R-13myc-kanMX (707)        | <i>tpz1-W498R,I501R-myc</i>                 |
| pBS-tpz1(1-485)-L449R-13myc-kanMX (773)       | <i>tpz1-[1-485]-L449R-myc</i>               |
| pBS-tpz1-L449R,W498R,I501R-13myc-kanMX (772)  | <i>tpz1-L449R,W498R,I501R-myc</i>           |
| pBS-tpz1(1-379)-13myc-kanMX (652)             | <i>tpz1-[1-379]-myc</i>                     |
| pBS-tpz1(1-420)-13myc-kanMX (653)             | <i>tpz1-[1-420]-myc</i>                     |
| pBS-tpz1( $\Delta$ 421-485)-13myc-kanMX (670) | <i>tpz1-<math>\Delta</math>421-485]-myc</i> |
