# Supplementary material for: Tpz1-Ccq1 and Tpz1-Poz1 Interactions within Fission Yeast Shelterin Modulate Ccq1 Thr93 Phosphorylation and Telomerase Recruitment
Source: PubMed Central journal article supplement (PMC4199508; doi:10.1371/journal.pgen.1004708), 2014-10-16
Supplement: pgen.1004708.s017.pdf [file pgen.1004708.s017.pdf]

**Table S4** Plasmids used in yeast 2-hybrid assays.

| Plasmid (Lab stock #)                                 | Description in Figures              |
|-------------------------------------------------------|-------------------------------------|
| pGADT7 (352)                                          | vector                              |
| pGADT7-Poz1 (452)                                     | Poz1                                |
| pGAD-GH-Ccq1 (549)                                    | Ccq1                                |
| pTM623 (pMP623; Pot1 with GAD) (464) <sup>1</sup>     | Pot1                                |
| pGBKT7 (356)                                          | vector                              |
| pGBKT7-Tpz1 (495)                                     | Tpz1-FL (full length)               |
| pGBKT7-Tpz1-[379-508] (614)                           | Tpz1-[379-508]                      |
| pGBKT7-Tpz1-[421-508] (616)                           | Tpz1-[421-508]                      |
| pGBKT7-Tpz1-[421-485] (651)                           | Tpz1-[421-485]                      |
| pGBKT7-Tpz1-[486-508] (650)                           | Tpz1-[486-508]                      |
| pGBKT7-Tpz1-[1-485] (708)                             | Tpz1-[1-485]                        |
| pGBKT7-Tpz1-[Δ421-485] (689)                          | Tpz1-[Δ421-485]                     |
| pGBKT7-Tpz1-Y439R (682)                               | Y439R                               |
| pGBKT7-Tpz1-L445R (683)                               | L445R                               |
| pGBKT7-Tpz1-E446R (684)                               | E446R                               |
| pGBKT7-Tpz1-Y439R,L445R,E446R (666)                   | Y439R,L445R,E446R                   |
| pGBKT7-Tpz1-Y439R,L445R (700)                         | Y439R,L445R                         |
| pGBKT7-Tpz1-L449R,Y453R (667)                         | L449R,Y453R                         |
| pGBKT7-Tpz1-L449R (685)                               | L449R                               |
| pGBKT7-Tpz1-Y439R,L445R,L449R (701)                   | Y439R,L445R,L449R                   |
| pGBKT7-Tpz1-Y453R (686)                               | Y453R                               |
| pGBKT7-Tpz1-[421-485]-L449R (763)                     | Tpz1-[421-485] L449R                |
| pGBKT7-Tpz1-[421-485]-Y439R,L445R (762)               | Tpz1-[421-485] Y439R,L445R          |
| pGBKT7-Tpz1-[421-485]-Y439R,L445R,L449R (764)         | Tpz1-[421-485] Y439R,L445R,L449R    |
| pGBKT7-Tpz1-W498R,I501R (669)                         | W498R,I501R                         |
| pGBKT7-Tpz1-[486-508]-W498R,I501R (673)               | Tpz1-[486-508] W498R,I501R          |
| pGBKT7-Tpz1-K386A (594)                               | K386A                               |
| pGBKT7-Tpz1-R433A,K434A (597)                         | R433A,K434A                         |
| pGBKT7-Tpz1-E455A,K459A,K460A (598)                   | E455A,K459A,K460A                   |
| pGBKT7-Tpz1-D497A,K500A,R505A (600)                   | D497A,K500A,R505A                   |
| pGBKT7-Tpz1-R433A,K434A,E455A,K459A,K460A (617)       | R433A,K434A,E455A,K459A,K460A       |
| pGBKT7-Tpz1-R433A,K434A,D497A,K500A,R505A (619)       | R433A,K434A,D497A,K500A,R505A       |
| pGBKT7-Tpz1-E455A,K459A,K460A,D497A,K500A,R505A (620) | E455A,K459A,K460A,D497A,K500A,R505A |
| pGBKT7-Tpz1-R433E,K434E (643)                         | R433E,K434E                         |
| pGBKT7-Tpz1-K459E,K460E (644)                         | K459E,K460E                         |
| pGBKT7-Tpz1-K500E,R505E (645)                         | K500E,R505E                         |
| pGBKT7-Tpz1-W498A,I501A (794)                         | W498A,I501A                         |
| pGBKT7-Tpz1-L449A (795)                               | L449A                               |
| pGBKT7-Tpz1-Y439A,L445A (796)                         | Y439A,L445A                         |

<sup>1</sup>From Ishikawa lab.
