# Supplementary material for: Tpz1-Ccq1 and Tpz1-Poz1 Interactions within Fission Yeast Shelterin Modulate Ccq1 Thr93 Phosphorylation and Telomerase Recruitment
Source: PubMed Central journal article supplement (PMC4199508; doi:10.1371/journal.pgen.1004708), 2014-10-16
Supplement: pgen.1004708.s018.pdf [file pgen.1004708.s018.pdf]

**Table S5** Statistical analysis of ChIP and *TER1* co-IP data by 2-tailed Student's t-test.

| Figure                                 | Genotypes and p-values <sup>1</sup> |                      |                      |                                  |      |
|----------------------------------------|-------------------------------------|----------------------|----------------------|----------------------------------|------|
| 5A                                     | no tag                              | <i>tpz1-myc</i>      |                      |                                  |      |
|                                        | <i>tpz1-myc</i>                     | $2.5 \times 10^{-4}$ |                      |                                  |      |
|                                        | <i>tpz1-myc ccq1Δ</i>               | $4.9 \times 10^{-5}$ | 0.024                |                                  |      |
|                                        | <i>tpz1-L449R-myc</i>               | $1.9 \times 10^{-4}$ | $9.3 \times 10^{-3}$ | 0.22                             |      |
|                                        | <i>tpz1-Y439R,L445R-myc</i>         | $8.9 \times 10^{-3}$ | $7.6 \times 10^{-3}$ | 0.11                             | 0.41 |
| <i>tpz1-Y439R,L445R,L449R-myc</i>      | 0.018                               | 0.029                | 0.46                 | 0.98                             | 0.61 |
| 5B                                     | no tag                              | <i>ccq1-myc</i>      |                      |                                  |      |
|                                        | <i>ccq1-myc</i>                     | $4.6 \times 10^{-7}$ |                      |                                  |      |
|                                        | <i>ccq1-myc tpz1-L449R</i>          | $5.6 \times 10^{-6}$ | $1.5 \times 10^{-4}$ |                                  |      |
|                                        | <i>ccq1-myc tpz1-Y439R,L445R</i>    | $2.3 \times 10^{-5}$ | $7.3 \times 10^{-5}$ | 0.037                            |      |
| <i>ccq1-myc tpz1-Y439R,L445R,L449R</i> | $2.1 \times 10^{-5}$                | $2.0 \times 10^{-4}$ | 0.29                 | 0.21                             |      |
| 5C                                     | no tag                              | <i>trt1-myc</i>      |                      |                                  |      |
|                                        | <i>trt1-myc</i>                     | $4.9 \times 10^{-6}$ |                      |                                  |      |
|                                        | <i>trt1-myc ccq1Δ</i>               | $8.2 \times 10^{-3}$ | $4.1 \times 10^{-3}$ |                                  |      |
|                                        | <i>trt1-myc tpz1-L449R</i>          | $1.7 \times 10^{-5}$ | $3.2 \times 10^{-4}$ | 0.47                             |      |
|                                        | <i>trt1-myc tpz1-Y439R,L445R</i>    | $2.7 \times 10^{-3}$ | $5.1 \times 10^{-3}$ | 0.82                             | 0.67 |
| <i>trt1-myc tpz1-Y439R,L445R,L449R</i> | $8.3 \times 10^{-3}$                | $4.4 \times 10^{-3}$ | 0.96                 | 0.53                             | 0.87 |
| 7A                                     | <i>tpz1-myc</i>                     |                      | <i>tpz1-myc</i>      |                                  |      |
|                                        | <i>tpz1-myc poz1Δ</i>               | $2.2 \times 10^{-3}$ | <i>poz1Δ</i>         |                                  |      |
|                                        | <i>tpz1-W498R,I501R-myc</i>         | $1.1 \times 10^{-3}$ | 0.65                 | <i>tpz1-W498R,I501R-myc</i>      |      |
| <i>tpz1-W498R,I501R-myc poz1Δ</i>      | $7.6 \times 10^{-3}$                | 0.55                 | 0.41                 |                                  |      |
| 7B                                     | <i>ccq1-myc</i>                     |                      | <i>ccq1-myc</i>      |                                  |      |
|                                        | <i>ccq1-myc poz1Δ</i>               | 0.39                 | <i>poz1Δ</i>         |                                  |      |
|                                        | <i>ccq1-myc tpz1-W498R,I501R</i>    | 0.10                 | 0.77                 | <i>ccq1-myc tpz1-W498R,I501R</i> |      |
| <i>ccq1-myc tpz1-W498R,I501R poz1Δ</i> | 0.07                                | 0.28                 | 0.35                 |                                  |      |
| 7C                                     | <i>poz1-myc</i>                     |                      | <i>poz1-myc</i>      |                                  |      |
|                                        | <i>poz1-myc rap1Δ</i>               | $7.7 \times 10^{-3}$ | <i>rap1Δ</i>         |                                  |      |
|                                        | <i>poz1-myc tpz1-W498R,I501R</i>    | $3.9 \times 10^{-3}$ | $1.6 \times 10^{-3}$ |                                  |      |
| <i>poz1-myc tpz1-W498R,I501R rap1Δ</i> | $1.8 \times 10^{-3}$                | $4.3 \times 10^{-4}$ | 0.21                 |                                  |      |

Characterization of fission yeast shelterin  
Harland *et al.*

|      |                                        |                                    |                                   |                            |                            |                                   |
|------|----------------------------------------|------------------------------------|-----------------------------------|----------------------------|----------------------------|-----------------------------------|
| 7D   |                                        | <i>trt1-myc</i>                    | <i>trt1-myc poz1Δ</i>             |                            |                            |                                   |
|      | <i>trt1-myc poz1Δ</i>                  | $5.3 \times 10^{-6}$               |                                   |                            |                            |                                   |
|      | <i>trt1-myc tpz1-W498R,I501R</i>       | $6.0 \times 10^{-5}$               | 0.09                              |                            |                            |                                   |
| S8D  |                                        | no tag                             | <i>tpz1-myc</i>                   | <i>tpz1-myc ccq1Δ</i>      | <i>tpz1-L449R-myc</i>      | <i>tpz1-Y439R, L445R-myc</i>      |
|      | <i>tpz1-myc</i>                        | $1.1 \times 10^{-3}$               |                                   |                            |                            |                                   |
|      | <i>tpz1-myc ccq1Δ</i>                  | 0.46                               | $2.0 \times 10^{-4}$              |                            |                            |                                   |
|      | <i>tpz1-L449R-myc</i>                  | 0.80                               | $1.3 \times 10^{-4}$              | 0.19                       |                            |                                   |
|      | <i>tpz1-Y439R,L445R-myc</i>            | 0.79                               | $4.8 \times 10^{-4}$              | 0.50                       | 0.52                       |                                   |
|      | <i>tpz1-Y439R,L445R,L449R-myc</i>      | 0.54                               | $2.0 \times 10^{-4}$              | 0.22                       | 0.24                       | 0.64                              |
| S9A  |                                        | no tag                             | <i>ccq1-myc</i>                   | <i>ccq1-myc tpz1-L449A</i> |                            |                                   |
|      | <i>ccq1-myc</i>                        | $2.7 \times 10^{-3}$               |                                   |                            |                            |                                   |
|      | <i>ccq1-myc tpz1-L449A</i>             | $8.2 \times 10^{-3}$               | 0.056                             |                            |                            |                                   |
|      | <i>ccq1-myc tpz1-L449R</i>             | $6.4 \times 10^{-6}$               | 0.035                             | 0.66                       |                            |                                   |
| S9B  |                                        | no tag                             | <i>trt1-myc</i>                   | <i>trt1-myc ccq1Δ</i>      | <i>trt1-myc tpz1-L449A</i> | <i>trt1-myc tpz1-L449R</i>        |
|      | <i>trt1-myc</i>                        | $4.9 \times 10^{-6}$               |                                   |                            |                            |                                   |
|      | <i>trt1-myc ccq1Δ</i>                  | $8.2 \times 10^{-3}$               | $4.1 \times 10^{-3}$              |                            |                            |                                   |
|      | <i>trg1-myc tpz1-L449A</i>             | $1.1 \times 10^{-5}$               | $1.2 \times 10^{-2}$              | 0.15                       |                            |                                   |
|      | <i>trt1-myc tpz1-L449R</i>             | $1.7 \times 10^{-5}$               | $3.2 \times 10^{-4}$              | 0.47                       | 0.20                       |                                   |
|      | <i>trt1-D743A-myc</i>                  | $8.1 \times 10^{-9}$               | $6.9 \times 10^{-3}$              | $7.3 \times 10^{-5}$       | $4.8 \times 10^{-5}$       | $1.1 \times 10^{-7}$              |
| S13A |                                        | no tag ( <i>tpz1<sup>+</sup></i> ) | <i>poz1Δ</i> (no tag)             | <i>tpz1-myc</i>            | <i>tpz1-myc poz1Δ</i>      | <i>tpz1-W498R, I501R-myc</i>      |
|      | <i>poz1Δ</i> (no tag)                  | 0.54                               |                                   |                            |                            |                                   |
|      | <i>tpz1-myc</i>                        | $1.8 \times 10^{-9}$               | $2.8 \times 10^{-5}$              |                            |                            |                                   |
|      | <i>tpz1-myc poz1Δ</i>                  | $5.2 \times 10^{-9}$               | $3.1 \times 10^{-5}$              | $1.0 \times 10^{-3}$       |                            |                                   |
|      | <i>tpz1-W498R,I501R-myc</i>            | $7.9 \times 10^{-10}$              | $5.1 \times 10^{-6}$              | $2.5 \times 10^{-3}$       | 0.67                       |                                   |
|      | <i>tpz1-W498R,I501R-myc poz1Δ</i>      | $1.9 \times 10^{-7}$               | $3.2 \times 10^{-4}$              | $2.6 \times 10^{-3}$       | 0.66                       | 0.50                              |
| S13B |                                        | no tag ( <i>tpz1<sup>+</sup></i> ) | <i>tpz1-W498R, I501R</i> (no tag) | <i>ccq1-myc</i>            | <i>ccq1-myc poz1Δ</i>      | <i>ccq1-myc tpz1-W498R, I501R</i> |
|      | <i>tpz1-W498R,I501R</i> (no tag)       | $7.2 \times 10^{-2}$               |                                   |                            |                            |                                   |
|      | <i>ccq1-myc</i>                        | $1.1 \times 10^{-4}$               | $1.1 \times 10^{-4}$              |                            |                            |                                   |
|      | <i>ccq1-myc poz1Δ</i>                  | $2.1 \times 10^{-4}$               | $2.1 \times 10^{-4}$              | 0.037                      |                            |                                   |
|      | <i>ccq1-myc tpz1-W498R,I501R</i>       | $1.0 \times 10^{-4}$               | $1.0 \times 10^{-4}$              | 0.041                      | 0.85                       |                                   |
|      | <i>ccq1-myc tpz1-W498R,I501R poz1Δ</i> | $1.0 \times 10^{-3}$               | $1.0 \times 10^{-3}$              | 0.31                       | 0.28                       | 0.32                              |

|      | no tag ( <i>tpz1</i> <sup>+</sup> )    | <i>tpz1-W498R</i> ,<br><i>I501R</i> (no tag) | <i>poz1-myc</i>      | <i>poz1-myc</i><br><i>rap1Δ</i> | <i>poz1-myc</i><br><i>tpz1-498R</i> ,<br><i>I501R</i> |
|------|----------------------------------------|----------------------------------------------|----------------------|---------------------------------|-------------------------------------------------------|
| S13C |                                        |                                              |                      |                                 |                                                       |
|      | <i>tpz1-W498R,I501R</i> (no tag)       | 0.44                                         |                      |                                 |                                                       |
|      | <i>poz1-myc</i>                        | 1.7x10 <sup>-3</sup>                         | 7.6x10 <sup>-5</sup> |                                 |                                                       |
|      | <i>poz1-myc rap1Δ</i>                  | 1.2x10 <sup>-3</sup>                         | 4.3x10 <sup>-5</sup> | 0.048                           |                                                       |
|      | <i>poz1-myc tpz1-W498R,I501R</i>       | 0.010                                        | 6.2x10 <sup>-4</sup> | 2.1x10 <sup>-3</sup>            | 1.6x10 <sup>-3</sup>                                  |
|      | <i>poz1-myc tpz1-W498R,I501R rap1Δ</i> | 4.5x10 <sup>-3</sup>                         | 2.6x10 <sup>-4</sup> | 5.0x10 <sup>-4</sup>            | 4.1x10 <sup>-4</sup>                                  |
|      |                                        |                                              |                      |                                 | 0.27                                                  |
|      | no tag ( <i>tpz1</i> <sup>+</sup> )    | <i>tpz1-W498R</i> ,<br><i>I501R</i> (no tag) | <i>trt1-myc</i>      | <i>trt1-myc</i><br><i>poz1Δ</i> |                                                       |
| S13D |                                        |                                              |                      |                                 |                                                       |
|      | <i>tpz1-W498R,I501R</i> (no tag)       | 0.97                                         |                      |                                 |                                                       |
|      | <i>trt1-myc</i>                        | 9.8x10 <sup>-6</sup>                         | 3.6x10 <sup>-6</sup> |                                 |                                                       |
|      | <i>trt1-myc poz1Δ</i>                  | 2.9x10 <sup>-6</sup>                         | 1.7x10 <sup>-6</sup> | 1.1x10 <sup>-3</sup>            |                                                       |
|      | <i>trt1-myc tpz1-W498R,I501R</i>       | 3.3x10 <sup>-5</sup>                         | 2.6x10 <sup>-5</sup> | 0.011                           | 0.61                                                  |

<sup>†</sup>Statistically significant differences (p≤0.05) are highlighted with red letters.
